1 **SANe: The Seed Active Network For Mining Transcriptional Regulatory Programs of Seed**  
2 **Development**

3 Chirag Gupta<sup>1</sup>, Arjun Krishnan<sup>2,a,b</sup>, Eva Collakova<sup>3</sup>, Pawel Wolinski<sup>4</sup> and Andy Pereira<sup>1,2,\*</sup>

4 <sup>1</sup> Crop, Soil, and Environmental Sciences, University of Arkansas, Fayetteville, Arkansas 72701

5 <sup>2</sup> Virginia Bioinformatics Institute, Virginia Tech, Blacksburg, Virginia 24061

6 <sup>3</sup> Department of Plant Pathology, Physiology, and Weed Science, Virginia Tech, Blacksburg,  
7 Virginia 24061

8 <sup>4</sup> High Performance Computing Center, University of Arkansas, Fayetteville, Arkansas 72701

9

10 <sup>a</sup> Current address: Computational Mathematics, Science, and Engineering, Michigan State University,  
11 MI 48824

12 <sup>b</sup> Current address: Biochemistry and Molecular Biology, Michigan State University, MI 48824

13

14 \*Corresponding author: Andy Pereira

15 [apereira@uark.edu](mailto:apereira@uark.edu)

16

17 Short Title: SANe: Seed Active Network

18

19

20

21

22

23

24

25

## 26 **Abstract**

27 Seed development is an evolutionarily important phase of the plant life cycle that governs the  
28 fate of next progeny. Distinct sub-regions within seeds have diverse roles in protecting and  
29 nourishing the embryo as it enlarges, and for the synthesis of storage reserves that serve as an  
30 important source of nutrients and energy for germination. Several studies have revealed that  
31 transcription factors (TFs) act in fine coordination to regulate target genes that ensure proper  
32 maintenance, metabolism, and development of the embryo. Here, we present genome-wide  
33 predictions of seed-specific regulatory interactions between TFs and their target genes in the  
34 model plant *Arabidopsis thaliana*. The network is based on a panel of high-resolution seed-  
35 specific gene expression datasets and takes the form of a module-regulatory network. TFs that  
36 are well studied in the literature were often found at the top of the predicted ranks for the module  
37 that corresponds to their validated function role. Furthermore, we brought together a dedicated  
38 web resource for the systematic analysis of transcriptional-level regulatory programs underlying  
39 the development of seeds (<https://plantstress-pereira.uark.edu/SANe/>). The platform will enable  
40 biologists to query a subset of modules, TFs of interest, as well as analyze new transcriptomes to  
41 find modules significantly perturbed in their experiment.

42

43

44

45

46

47

48

49

50

51

52

## 53 Introduction

54 The evolutionary success of plants lies in their ability to produce seeds and aid their dispersal,  
55 which ensures the progression of generations. Seeds are complex organized structures that help  
56 plants pause their life cycle under unfavorable conditions, and resume growth once  
57 environmental conditions become favorable. Like all angiosperms, in *Arabidopsis*, a double  
58 fertilization event marks the beginning of seed development that progresses into the development  
59 of the embryo, endosperm and seed coat over a period of 20-21 days after pollination. These  
60 morphologically distinct sub-compartments within a seed play diverse roles and function in  
61 concert during the entire phase of seed formation. During maturation, the synthesis of storage  
62 reserves takes place and developmental programs like desiccation tolerance and dormancy are  
63 initiated. These seed storage reserves are the fuel for seedling emergence during germination.

64 Several transcription factors (TFs) that regulate various aspects of seed development as  
65 well as germination have been revealed by genetic screens (Grossniklaus et al., 1998; Lotan et  
66 al., 1998; Ogas et al., 1999; Johnson et al., 2002; To et al., 2006). Among these TFs, three  
67 members of the B3 super family, namely, *LEAFY COTYLEDON 2 (LEC2)*, *ABSCISIC ACID*  
68 *INSENSITIVE 3 (ABI3)* and *FUSCA3 (FUS3)*, along with two members of the LEC1-type, *LEC1*  
69 and *LEC1-LIKE* that together form the ‘LAFL’ network (Jia et al., 2013), are the most prominent  
70 players of seed maturation. However, the existing LAFL network is still incomplete and  
71 represents only a subset of regulatory networks active during seed development. The functional  
72 roles of several other TFs that express in seed tissues remains largely unknown. Although  
73 genetic interactions, functional redundancy and cooperativity between TFs will be more  
74 accurately revealed by genetic perturbations, an underpinning of seed regulatory networks from a  
75 computational standpoint will provide tools for quick identification and prioritization of  
76 candidates for experimentation *in vivo*.

77 DNA microarrays have served as efficient experimental systems for simultaneously  
78 probing genome-wide transcriptional level activities of specific cellular states. In recent years, an  
79 upsurge in the availability of these high-throughput gene expression datasets motivated  
80 coexpression based approaches to be applied for an understanding of gene functions. An  
81 integrative analysis of expression datasets enables the estimation of similarity in patterns of gene  
82 expression across a diverse set of experimental conditions. Genes with similar expression

83 profiles are grouped into clusters of coexpressed genes. Functional (Castillo-Davis and Hartl,  
84 2003) and genomic (Huttenhower et al., 2009) annotations of these gene clusters then aid in  
85 making functional predictions of uncharacterized genes within these clusters (Childs et al.,  
86 2011). There are several such coexpression databases across many model organisms that are now  
87 being actively used in gene function prediction and gene prioritization for experimental assays in  
88 plants (Obayashi and Kinoshita, 2011; Sato et al., 2012; Yim et al., 2013; Aoki et al., 2016).

89 Coexpression networks, however, lack information about regulatory interactions  
90 represented in the expression data. Genes encoding regulatory proteins (e.g., TFs) coordinately  
91 regulate the biological functions of multiple target genes by directly interacting with their  
92 promoters and activating or repressing their expression. Since TFs are themselves  
93 transcriptionally regulated, they can also be targets of other TFs, giving the network a  
94 hierarchical structure (Ma et al., 2004; Spitz and Furlong, 2012). Hence, a strongly coexpressed  
95 TF-gene pair might not necessarily mean a direct physical interaction, but can be observed as an  
96 indirect regulatory effect, even if they co-occur in a single functionally related cluster. Moreover,  
97 the affinity of a TF for a target gene can be highly tissue-specific or dependent on the metabolic  
98 state of the cell. Therefore, to deduce a regulatory network prioritizing TFs, the underlying  
99 expression data should have a unifying biological context (e.g. datasets for a specific tissue or  
100 condition) and coexpressed edges should be filtered for indirect interactions to minimize false  
101 positives. However, inferring accurate regulatory networks using solely gene expression data  
102 requires a large number of empirical data points for each space and time combination, for a  
103 robust statistical and biological inference. Nonetheless, for plant biologists, accumulated datasets  
104 in *Arabidopsis* are large enough to elucidate specificity of coexpression and predict key  
105 functional roles of TFs.

106 In recent years, several reverse engineering solutions have been brought forward that aim  
107 to model coexpression data in a way such that direct interactions involving known regulatory  
108 genes are given a priority (Basso et al., 2005; Faith et al., 2007; Huynh-Thu et al., 2010). These  
109 algorithms use a successive edge filtering step to recover potentially direct interactions between  
110 TFs and their targets. For example, the ARACNE algorithm assumes that in a triplet of  
111 connected nodes, the edge with lowest coexpression score is representative of an indirect  
112 interaction (Margolin et al., 2006). The GENIE method sets a feature selection problem for every

113 gene to find the best subset of regulators from all the remaining genes (Huynh-Thu et al., 2010).  
114 The CLR algorithm aims to identify direct transcriptional interactions by using a background  
115 correction scheme that suppresses noise arising due to high correlations between indirect  
116 interactions (Faith et al., 2007). These algorithms have all been successfully used for inferring  
117 plant gene regulatory networks (Yu et al., 2011; Chavez Montes et al., 2014; Vermeirssen et al.,  
118 2014).

119 In the work presented here, we focused on a comprehensive published gene expression  
120 dataset acquired from the seed development phases of Arabidopsis (Belmonte et al., 2013), and  
121 constructed a regulatory network highly predictive of seed-specific functions of TFs (Fig. 1).  
122 First, we harnessed the power of coexpression and graph clustering to partition genes into  
123 functionally related modules, and mapped the spatio-temporal activities of these modules.  
124 Simultaneously, for every identified TF in the Arabidopsis genome, we computed its partial  
125 coexpression score with every possible target gene and used these scores as a parameter for gene  
126 set enrichment analysis using coexpressed modules as gene sets. In this way, we could identify  
127 the modules that were statistically-most-likely targets of each TF. Using systematic reduction of  
128 data points and prior knowledge from the literature to interpret the associations, we observed that  
129 several TFs that are known to have an aberrant seed phenotype were predicted as the most  
130 significant regulators of modules for which their function has been experimentally validated. For  
131 example, a recently discovered association between the TF *AGL67* and desiccation tolerance  
132 (González-Morales et al., 2016), and *MYB107* and suberin (Lashbrooke et al., 2016) was  
133 correctly predicted in our network. These and several other correctly predicted associations  
134 (described later in the text) motivated us to create an online resource for the community. Our  
135 network, which we termed the ‘Seed Active Network’ or SANe, is hosted at [https://plantstress-](https://plantstress-pereira.uark.edu/SANe/)  
136 [pereira.uark.edu/SANe/](https://plantstress-pereira.uark.edu/SANe/) to provide a network-based understanding of seed development.

137

138

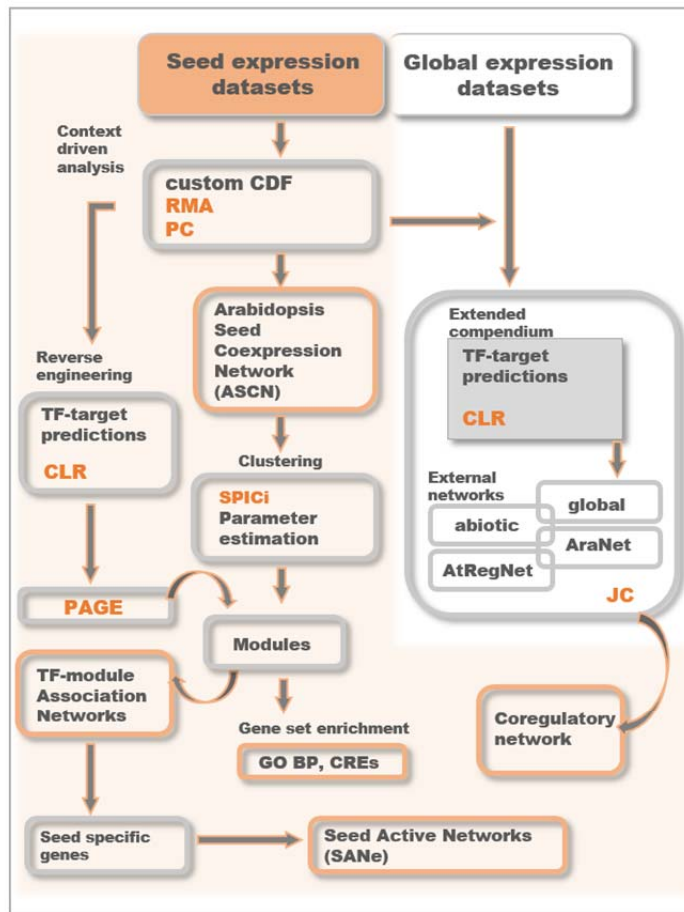

**Figure 1: Pipeline for tissue-specific module regulatory network analysis.** Two separate Arabidopsis gene expression compendiums (EC) were created: one from a seed-specific expression data series (GSE12404) and one from non-tissue-specific (global) 140 expression datasets. Datasets in both the EC were normalized individually using RMA algorithm in R. Z scores of Pearson's Correlations (PC) were calculated for all gene-pairs in both the EC. From seed EC, gene pairs with PC > 0.73 ( $Z > 1.96$ ) were connected to create the Arabidopsis Seed coexpression network (ASCN). ASCN was then clustered using SPICi at a range of clustering thresholds ( $T_d$ ), and an optimal clustering parameter was chosen based on genome coverage and coherence of genes as a functional group. 1563 clusters obtained at  $T_d$  0.80 were tested for enrichment of biological processes from the gene ontology and known plant *cis* regulatory elements for multiple databases. A list of 1921 TFs was supplied to the CLR (context likelihood of relatedness) algorithm to predict their targets in both the EC. In the seed EC, the PAGE algorithm was used to score the enrichment of CLR-weighted targets in the ASCN clusters, and a TF-module association network was created. The network was queried with a list of genes expressed predominantly in the seed as compared to other organs/tissues, and the Seed Active Network or SANE, was derived. Simultaneously, the seed-specific network was compared with the network created using the global EC and multiple other Arabidopsis regulatory networks downloaded from published studies.

## 139 Results

### 140 Seed coexpression network

141 To avoid implementing procedures of minimizing batch effects and the errors associated with  
142 microarray data integration (Chen et al., 2011; Nygaard et al., 2015), we chose Arabidopsis gene  
143 expression profiles from the data super series labeled GSE12404 in the gene expression omnibus  
144 (GEO) database (Barrett et al., 2007). This series is comprised of 87 samples derived from 6  
145 discrete stages of seed development, and 5-6 different compartments within each stage, reflecting  
146 the most comprehensive source of Arabidopsis seed-specific gene expression profiles. With a  
147 sample size large enough for statistical inferences, these datasets were also devoid of the  
148 ambiguities introduced by the context under which the experiment was performed (intra-  
149 laboratory bias), one of the major problems in context-driven integrative analyses of gene  
150 expression data. We normalized and summarized this expression data into an integrated gene  
151 expression matrix using a custom CDF file of Arabidopsis microarray to reduce off-target  
152 hybridizations (Harb et al., 2010). Pearson's correlations (PC) scores between all gene-pairs in  
153 the gene expression matrix were then calculated and mapped to Z scores using Fisher's Z-  
154 transformation (Huttenhower et al., 2006). Gene pairs with significantly high correlation in  
155 expression (PC 0.753, Z-score >1.96) were connected and the rest filtered out. We named this  
156 core of raw coexpression data with ~7.6 million edges as the Arabidopsis seed coexpression  
157 network (ASCN).

## 158 **Identification of clusters in coexpression data**

159 Identification of communities, or clustering, is the most prominent step in network based  
160 interpretation of genomic data. In terms of gene expression data, clustering provides a useful way  
161 to group genes with similar expression profiles together. The need for gene grouping is based on  
162 the percept that expression similarity is indicative of similarity in function (Eisen et al., 1998).  
163 Therefore, clustering furthers an understanding of the function of a previously uncharacterized  
164 gene, based on known functions of other members of the same group. However, the choice of  
165 clustering method heavily influences the accuracy of functional predictions (Yeung et al., 2001).  
166 Clustering algorithms typically require either a predefined number of clusters, as in k-means  
167 clustering, or the process is semiautomatic (Langfelder and Horvath, 2008), and is sometimes  
168 computationally expensive.

169 In our network framework, we used an unbiased data-driven method to cluster genes  
170 within the ASCN. The density of a cluster, measured as the ratio of the number of observed



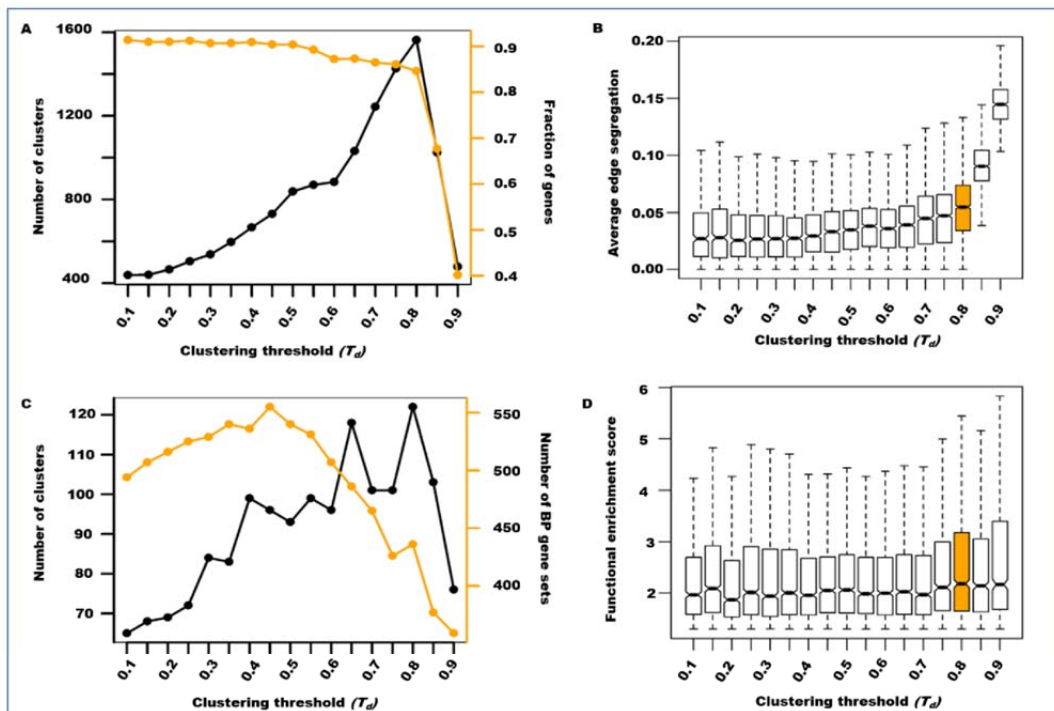

**Figure 2: Evaluation of clustering threshold ( $T_d$ ).** Genes from the Arabidopsis seed coexpression network were clustered at a range of  $T_d$  values shown on the X axis of all the figures. Each  $T_d$  was examined by: A) A genome coverage plot measuring the number of clusters yielded and the fraction of original genes retained (orange line corresponding orange Y axis). B) Boxplots showing average edge segregation of all the clusters, indicating overall modularity of the network within each  $T_d$ . C) A plot showing number of clusters enriched with at least one BP term and the total number of BP terms retained (orange line corresponding orange Y axis) and D) Boxplots summarizing the enrichment scores  $[-1 \cdot \log(\text{FDR})]$  of the hypergeometric p-values obtained by BP-cluster overlap analysis.

171 edges in a cluster to the total number of expected edges, reflects cohesiveness among the  
 172 members of the same cluster. The SPICi algorithm evaluates density to group similar genes in a  
 173 biological network, while considering the confidence weight on each edge (Jiang and Singh,



174 2010). We sought to identify an optimum density threshold ( $T_d$ ) that yields clusters at a  
175 granularity that delivers biological information, while preserving the inherent topological  
176 features of the network. A range of  $T_d$  values were evaluated for performance in loss or gain of  
177 information, with a goal of separating genes into as many clusters as possible, without losing  
178 many genes originally present on the microarray. At  $T_d$  0.80, 84% of the ASCN genes formed  
179 1563 clusters, after which a significant loss of information occurred, as indicated by a sharp fall  
180 in the fraction of total genes retained (Fig. 2A). At the same threshold of 0.80, the average  
181 modularity within clusters was also maximized (at a bearable cost of gene loss) (Fig 2B).  
182 Modularity measures how functionally separable the clusters are, in the sense that how well  
183 genes within a clusters interact with each other as compared to genes outside the cluster (Albert,  
184 2005).

185 For a function-level analysis, it is also important that genes within each cluster are  
186 representative of common biological functions, as grouping genes would not yield any functional  
187 predictions if at least one putative function of the group is not known. To further establish  
188 confidence in  $T_d$  0.80 as the best solution for partitioning, we evaluated each  $T_d$  for its ability to  
189 categorize known information about Arabidopsis biological pathways derived from the Gene  
190 Ontology (GO) annotated gene sets in the biological process (BP) category. A full set of  
191 annotation terms satisfying the parent-child relationships were used to find overlaps with clusters  
192 obtained at every  $T_d$ . The significance of overlap was tested under the hypergeometric  
193 distribution (see “Methods”). The functional coherence of the network, evaluated based on the  
194 total number of clusters with enriched BP terms, total number of distinct BP terms and the  
195 overall functional enrichment score, was also found to be best preserved at  $T_d$  0.80 (Fig 2B and  
196 2C).

197 Overall, the network lost its stability and collapsed at  $T_d$  values exceeding 0.80, as  
198 indicated by all measured clustering parameters (Fig. 2). Hence, 1563 dense clusters obtained at  
199  $T_d$  0.80 were used for further analysis. The total number of genes in these modules amounts to  
200 17,949 (Supplemental Data S1).

## 201 **Transcriptional regulators of seed modules**

202 Modules of coexpressed genes in ASCN retained information about possible functional  
203 interactions between genes and their responses during different stages of seed development. This

204 greatly expanded upon the currently available functional annotations of Arabidopsis genes, as the  
205 genes that were lacking functional annotations now have at least one putative function assigned  
206 based on their module participation. The next task was to leverage on this information in the  
207 coexpression data and identify key TFs that statistically associate with each of the ASCN  
208 modules. There are 1921 unique locus IDs in the Plant Transcription Factor Database (Jin et al.,  
209 2014), the AGRIS database (Yilmaz et al., 2011) and the Database of Arabidopsis Transcription  
210 Factors (Guo et al., 2005), corresponding to TF genes in Arabidopsis. We used this  
211 comprehensive list to obtain transcriptional regulators for our analysis.

212         Simply associating genes as targets of TFs that they ‘highly coexpress’ with (first  
213 neighbors) is prone to the occurrence of false positives in a genome-scale analysis. This  
214 occurrence is mainly due to correlations arising from indirect regulation or coincidental  
215 coexpression of genes involved in different and unrelated processes that need to be active under  
216 the same circumstances. To minimize this effect, we calculated how likely a predicted TF-gene  
217 interaction was given the empirical background distribution of correlation scores of both the  
218 genes under consideration (Faith et al., 2007) (reported as a Z-score, see Methods)  
219 (Supplemental Data S2). Next, we sought to identify those modules that had higher enrichment  
220 of most probable targets for each TF. Instead of choosing an arbitrary cutoff for selecting targets,  
221 we used the entire set of predictions for each TF, weighted by Z-scores, and worked under the  
222 framework of Parametric Analysis of Gene set Enrichment (PAGE) (Kim and Volsky, 2005).  
223 The PAGE algorithm uses the normal distribution for statistical inference and states the degree of  
224 enrichment (here ‘association’) of a given gene set (here module) amongst the most highly  
225 scored predicted targets of a given TF. This analysis is essentially similar to that of a two-tail  
226 enrichment test with GO BP terms (treated as gene sets) (Ambavaram et al., 2011). Here, the  
227 difference was that gene sets from coexpression clusters observed in a specific tissue was used.  
228 To provide a normal distribution for association scoring, we used only those modules that had  
229 more than 10 genes, as suggested by the authors of the PAGE algorithm. Using this robust  
230 formulation, 1819 TFs were linked to 278 modules comprised of 10,526 genes (cluster 1 with  
231 1621 genes was considered an outlier cluster because it contained disproportional number of  
232 genes as compared to other clusters). We labeled this network core as ‘TF-Module Network’  
233 (TMN). TMN is represented as a matrix with TFs in rows and modules in columns, with each  
234 cell in the matrix representing a TF-module association score given by PAGE (Fig. 3A).

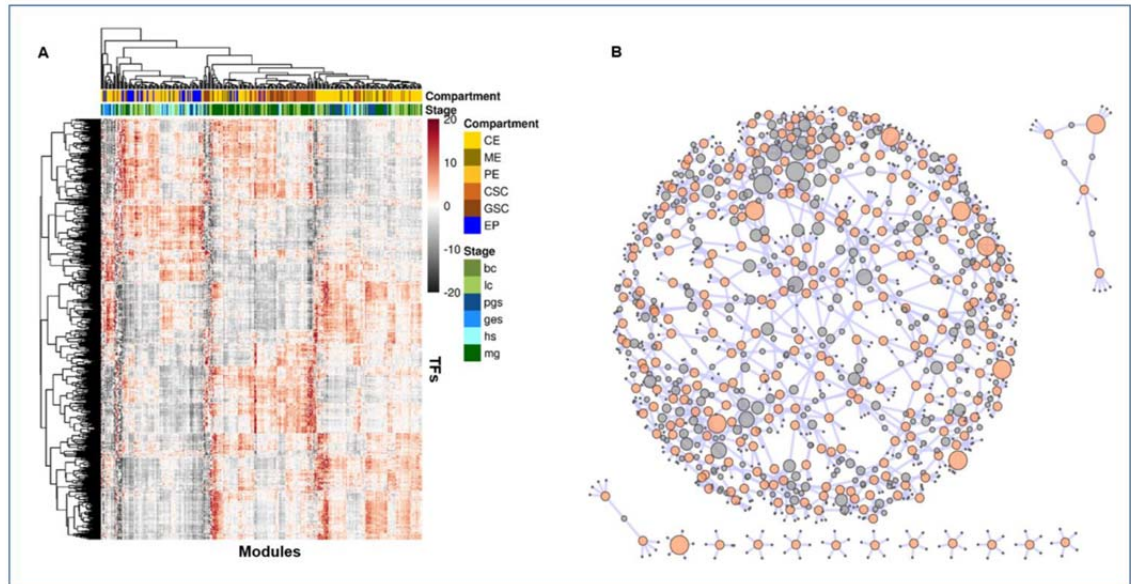

**Figure 3: TF-Module Association Network (TMN).** **A)** Heatmap representing association scores of 1819 TFs as regulators in the rows, and 10526 genes grouped into 278 coexpression modules represented along the columns. Each grid in the heatmap is color coded according to the level of enrichment of predicted targets of each TF regulator in the corresponding module. The red gradient indicates a positive score and grey indicates a negative score, estimated using the PAGE algorithm. The seed compartment in which the module has maximum expression is color-coded and represented on top of the heatmap (first row), where CE is chalazal endosperm, ME is micropylar endosperm, PE is peripheral endosperm, CSC and GSC is chalazal and general seed coat, respectively, and EP is embryo proper. The development stage in which the module has maximum expression is color-coded and represented on top of the heatmap (second row), where bc is bending cotyledon, lc is linear cotyledon, pgs is pre-globular stage, ges is globular embryo stage, hs is heart stage and mg is mature green stages. **B)** Predictions for each of the 278 modules were ranked and the top 5 predicted regulators for each module were visualized as a network graph. Each grey circle in the network plot is a TF and each orange circle is a module. The size of the grey circle is proportional to the out-going degree of the TF. Size of the orange circle was set to a constant, except for 9 bigger circles showing the modules described later in the main text. The network was visualized using Cytoscape version 3.3.0. Node names are hidden for ease in visualization. The cytoscape sessions file is provided as supplemental data S3, which can be loaded into Cytoscape for node names and further exploration of the network. The heatmap was drawn using gplots package in the R statistical computing environment.

235           The TMN provides a regulatory map of seed transcriptional activities, in the form of a  
236 bipartite graph, with TFs as one set of nodes and sets of genes reduced to their ‘functions’ as  
237 another set of nodes, and edges weighted by the degree of association between the corresponding

238 TF and the function. For visualization, we selected the top 5 predicted TF regulators for each  
239 module, ranked based on absolute association scores, and visualized TMN as a graph in  
240 Cytoscape (Fig. 3B; Supplemental Data S3). A total of 900 regulators were represented in top 5  
241 predictions for each of the 278 modules. Most the modules were found indirectly connected due  
242 to combinatorial links between their predicted TF regulators, forming a dense network while 11  
243 modules shared no common predicted TF regulators with other modules.

#### 244 **Modules active during seed development**

245 Seed-specific genes were previously discovered as those that were present only in seed tissues,  
246 and not in other reproductive or vegetative parts of the plant (Le et al., 2010; Belmonte et al.,  
247 2013). We sought for those modules that harbored at least one such gene and identified a core set  
248 of 120 modules comprised of 7414 genes. We called these modules as ‘active modules’. We  
249 reasoned that because these modules retained genes specific to seed development, their  
250 coexpression neighborhood – along with the top ranked regulators – will pave way to  
251 identification of transcriptional networks modulated specifically during seed development, or  
252 involved in important seed functions. Therefore, novel TFs that are already part of these  
253 modules, or emerge as the top regulators will automatically become the primary candidates for  
254 testing seed phenotypes, largely reducing the search space. Also, the strategy of probing TMN  
255 with a list of genes already prioritized had less chances of observing false positives from a gamut  
256 of predicted regulatory programs, while making the process of interpreting the regulation  
257 patterns easier. We labelled this core of 120 active modules along with their scored TF regulators  
258 as the ‘Seed Active Network’ (SANE) (Supplemental Data S4).

259 We simultaneously mapped the expression patterns of each module spatially and  
260 temporally (seed compartment wise and development stage wise), by averaging the expression of  
261 module genes in each seed-compartment irrespective of the development stage or within each  
262 development stage irrespective of the seed compartment. After interfacing the expression  
263 patterns of each module with BPs and known *cis* regulatory elements (CREs) (Supplemental  
264 Data S5 and S6; see “Methods”) and predicted sets of top regulators, a few modules that had  
265 high expression in different seed compartments (embryo, endosperm and seed-coat regions) were  
266 visually examined using heatmaps (Fig. 4). These modules expand a wide variety of cellular  
267 processes, including flavonoid metabolism during seed coat formation, lipid storage and



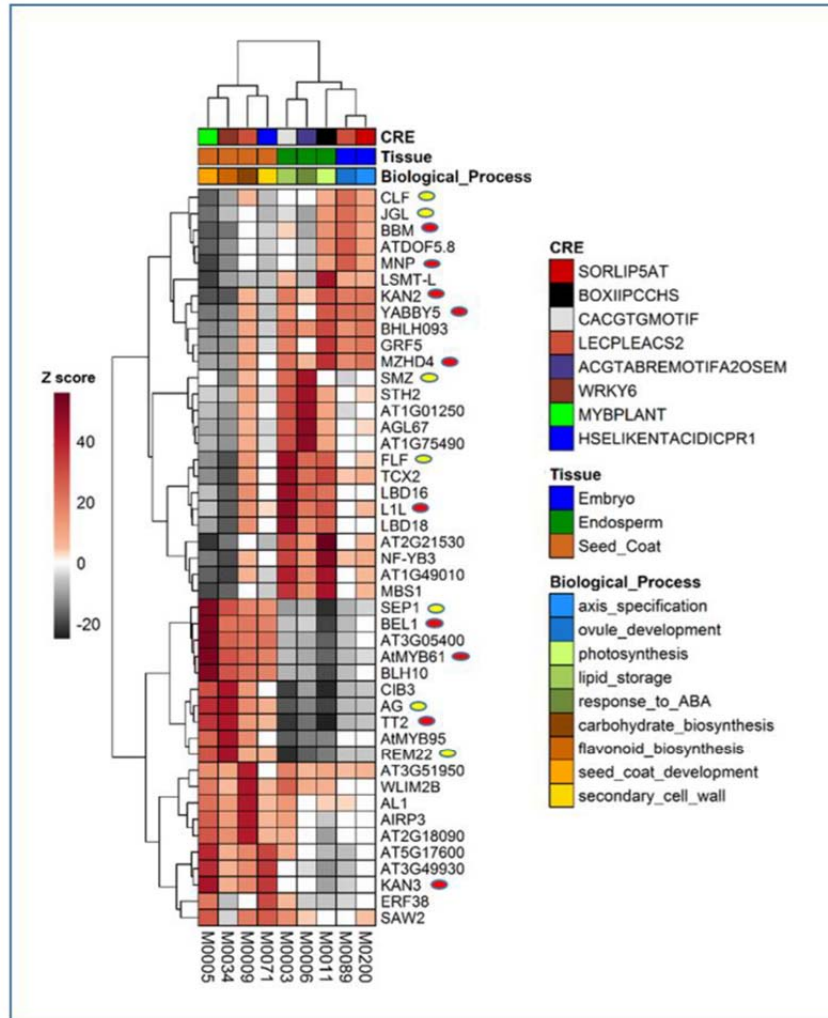

**Figure 4: Heatmap representation of a subset of the SANE.** Modules with high relative expression in embryo, endosperm and seed coat regions were extracted from SANE. Modules are shown in columns and for each module, the top 5 predicted TF regulators are shown in rows. Each grid in the heatmap is colored according to the association score estimated using the PAGE algorithm. Positive and negative scores are shaded in red or black gradient, respectively, as indicated by the color key. Literature identified TFs with validated seed-specific phenotypes or phenotypes observed in other reproductive stages/tissues are marked with a red ellipse or a yellow ellipse, respectively. CRE, cell-type and functional annotations for each module are shown above the heatmap (top three rows; colored boxes). Modules annotated for embryo, endosperm and seed coat are indicated in blue, green and brown boxes, respectively, in the middle row. CRE and functional annotation for each module is color-coded uniquely in the top and bottom rows, respectively.

268 photosynthesis during endosperm development and auxin transport and tissue development from  
 269 early to late stages of embryogenesis. Visualization of a few modules revealed that there is a  
 270 high intra-module connectivity between modules that participate in the same developmental

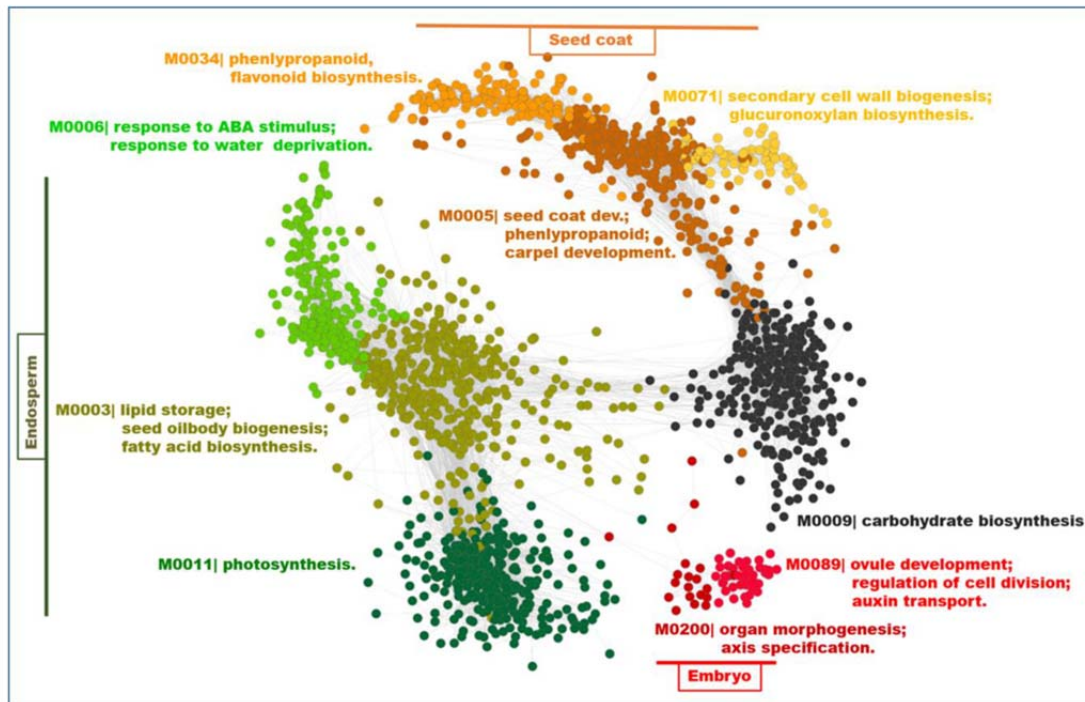

**Figure 5: Visualization of seed modules.** A graphical representation of seed coexpression modules. Each circle represents a gene. Each module is color coded uniquely. Modules are grouped according to the seed compartments (indicated by horizontal or vertical lines and text boxes), and labelled with the BP term most highly over-represented within each module. Genes are left unlabeled to facilitate visualization. The network was drawn in Cytoscape version 3.3.0. .

271 program in a tissue-specific manner, albeit with different biological goals (Fig. 5). A few such  
272 modules are described below.

### 273 **Modules for early embryo development**

274 Three modules designated as M0089, M0200 and M0277 comprised 54, 31 and 33 genes,  
275 respectively, expressed at relatively high levels in the embryonic tissue when compared to other  
276 seed compartments (Fig. 6A). These genes are significantly enriched with BP terms like “organ  
277 development”, “tissue development”, “axis specification” and “auxin transport”. This is  
278 consistent with processes related to embryo development, involving morphogenesis-related and  
279 other cellular processes that govern gene activity related to cell division and expansion,  
280 maintenance of meristems and cell fate determination (Wendrich and Weijers, 2013).

281 M0089 harbors genes related to reproductive tissue development and cell division.  
282 *ATDOF5.8* (AT5G66940) was predicted as the top regulator of M0089. The *ATDOF5.8* gene is  
283 most highly expressed in embryo and meristem cells (Supplemental Fig. S1A) based on the  
284 Genevisible tool in GENEVESTIGATOR (Zimmermann et al., 2004). It has been shown that  
285 *ATFOD5.8* is an abiotic stress-related TF that acts upstream of *ANAC069/NTM2* (AT4G01550)  
286 (He et al., 2015). Interestingly, the *NTM2* gene resides at a locus adjacent to another NAC  
287 domain TF, *NTM1* (AT4G01540), a regulator of cell division in vegetative tissues (Kim et al.,  
288 2006). Kim et al. did not detect *NTM2* expression in leaves by RT-PCR. However, they indicated  
289 that because both *NTM* genes have similar structural organization, encoding proteins with a few  
290 differences in the protein chain, *NTM2* could be involved in similar processes in other tissues.  
291 Our predictions suggest that *NTM2* could be in the *ATDOF5.8* regulon associated with  
292 modulating cell division activity in the seed. This leads to a new testable hypothesis pertaining to  
293 regulation of cell division during embryogenesis. Among other known regulators, *BABY BOOM*  
294 (*BBM*, AT5G17430) was predicted as one of the top ranked TF (rank 4) of M0089. *BBM* is an  
295 AP2 TF that regulates the embryonic phase of development (Boutilier et al., 2002).



296           YAB5 (AT2G26580) and ATMYB62 (AT1G68320) were predicted the top ranked  
297 regulators of M0200 and M0277, respectively. While the agreement of YAB5 as a determinant  
298 of abaxial leaf polarity (Husbands et al., 2015) and enrichment of M0200 with GO BP term “axis

299 specification” (GO:0009798) justifies this association, the association of *ATMYB62* with  
300 *M0277* indicates a hormonal interaction likely representing a transition between the growth  
301 stages. *ATMYB62* encodes a regulator of gibberellic acid biosynthesis (Devaiah et al., 2009) and

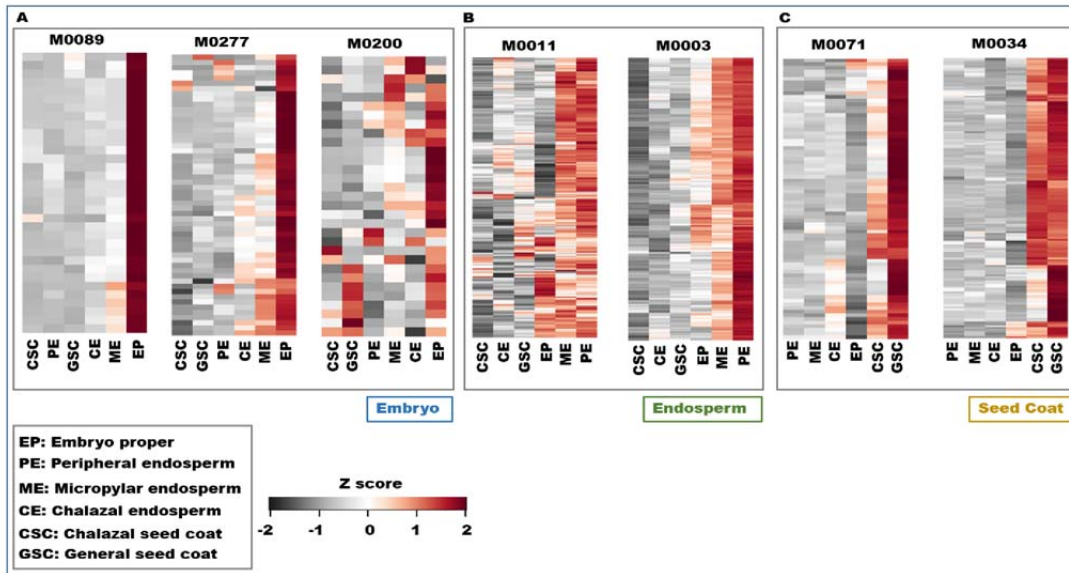

**Figure 6: Expression profiling of gene modules.** Expression patterns of modules in embryo, endosperm and seed coat regions represented as heatmaps in A), B), and C), respectively. Seed compartments are represented as columns and genes as rows. Gene names are hidden for ease in visualization. Expression values of genes in each module were averaged across samples from the same tissue-type/seed-compartment (embryo, endosperm and seed coat). Average expression values were scaled and represented as a Z score in the heatmaps. Red indicates higher expression of a gene in a particular compartment and black gradient indicates lower expression relative to other compartments.

302 is expressed specifically during seed development (Belmonte et al., 2013). M0277 is enriched  
 303 with “auxin transport” genes (GO:0009926). The *ATMYB62* gene is preferentially expressed in  
 304 the abscission zone and other reproductive tissues (Supplemental Fig. S1B).

305

## 306 **Modules for Endosperm Development**

307 The endosperm has a profound influence on seed development by supplying nutrients to the  
308 growing embryo (Portereiko et al., 2006; Chen et al., 2015). The importance of endosperm  
309 cellularization for embryo vitality has been shown through mutants deficient in endosperm-  
310 specific fertilization events (Kohler et al., 2003). The overall seed size depends on endosperm  
311 development and is controlled through the relative dosage of accumulated paternal and maternal  
312 alleles (Luo et al., 2005).

313 We found that genes in modules M0003 and M0011 had maximal expression levels in  
314 endosperm tissues (Fig. 6B). M0003 is significantly enriched with genes involved in lipid  
315 storage (GO:0019915) and fatty acid biosynthesis (GO:0006633). LEC1-LIKE (L1L,  
316 AT5G47670) emerged as the top regulator of this module. L1L is related to LEAFY  
317 COTYLEDON 1 (LEC1) and functions during early seed filling as a positive regulator of seed  
318 storage compound accumulation (Kwong et al., 2003). Interestingly, L1L is also part of this  
319 module indicating that, apart from being a master regulator, its activity is also modulated during  
320 the late seed filling stages as observed previously (Kwong et al., 2003), which correlates with the  
321 overall expression pattern of genes within this module (Supplemental Fig. S2). The presence of  
322 44 other TFs in this module, including FUS3 and ABI3, key regulators of seed maturation (Keith  
323 et al., 1994; Luerßen et al., 1998; Yamamoto et al., 2009), points to the importance of this  
324 module in nutrient supply to the developing embryo. LDB18 (AT2G45420) is a LOB-domain  
325 containing protein of unknown function predicted as the second ranked regulator of this module.  
326 GENEVESTIGATOR analysis showed that both *L1L* and *LDB18* are most highly expressed in  
327 the micropylar endosperm (Supplemental Fig. S3).

328 M0011 is comprised of 357 genes, including 7 TFs and is characterized by containing  
329 genes with high expression levels in the micropylar endosperm (ME) and the peripheral  
330 endosperm (PE). GO enrichment analysis showed the highest scores for photosynthesis  
331 (GO:0015979) of genes in this module. Close examination of these genes revealed that virtually  
332 all aspects associated with chloroplast formation and function were represented, including  
333 chloroplast biogenesis and membrane component synthesis, chlorophyll biosynthesis, plastidic  
334 gene expression, photosynthetic light harvesting and electron transport chain, ATP production,

335 redox regulation and oxidative stress responses, Calvin cycle and photosynthetic metabolism,  
336 metabolite transport, and retrograde signaling. Interestingly, genes encoding photorespiratory  
337 enzymes (glycine decarboxylase, glyoxylate reductase, and hydroxypyruvate reductase) were  
338 also present in M0011. Developing oilseeds are known to keep extremely high levels of CO<sub>2</sub>  
339 that would suppress photorespiration (Goffman et al., 2004), and the implications of expression  
340 of these genes on photosynthetic metabolism are not clear.

341 The presence of mostly photosynthetic genes in M0011 seems also unusual, but the  
342 results are consistent with findings of (Belmonte et al., 2013), showing that specific types of  
343 endosperm cells are photosynthetic, as they contain differentiated chloroplasts and express  
344 photosynthesis-related genes. Fully differentiated embryos at the seed-filling stages and the  
345 chlorophyll-containing inner integument ii2 of the seed coat are parts of oilseeds that are also  
346 capable of photosynthesis (Belmonte et al., 2013; Sreenivasulu and Wobus, 2013). Although  
347 seeds obtain the majority of nutrients maternally, Arabidopsis embryos remain green during seed  
348 filling and maintain a functional photosynthesis apparatus similar to that in leaves (Allorent et  
349 al., 2015). As part of photoheterotrophic metabolism, photosynthesis provides at least 50% of  
350 reductant in oilseed embryos and CO<sub>2</sub> is re-fixed through the RuBisCo bypass that helps to  
351 increase carbon-use efficiency in developing oilseeds (Ruuska et al., 2004; Schwender et al.,  
352 2004; Goffman et al., 2005; Fait et al., 2006). The roles for photosynthesis in ME and PE remain  
353 to be investigated and include (i) providing carbon and energy for storage compound  
354 accumulation in the endosperm and the embryo and (ii) increasing the availability of oxygen to  
355 the endosperm and differentiating, yet-to-be photosynthetic, embryos in a high-CO<sub>2</sub>  
356 environment.

357 CRE analysis revealed the highest number of motifs enriched in the promoters of genes in  
358 M0011, suggesting extensive coordination between different regulators. Light-related motifs  
359 BOXIIPCCHS (ACGTGGC), IRO2OS (CACGTGG3), IBOXCORENT (GATAAGR) and the  
360 ABA-responsive element ACGTABREMOTIFA2OSEM are the most over-represented motifs in  
361 this module. The highest ranked regulator of M0011 is a SMAD/FHA domain-containing  
362 protein (AT2G21530) that is most highly expressed in the cotyledons (Supplemental Fig. S4A).  
363 The known seed-specific regulator of oil synthesis and accumulation WRI1 (AT3G54320) was  
364 identified as the sixth ranked regulator of this module and is suggested to be predominantly

365 expressed in the embryo and endosperm (Supplemental Fig. S4B). *WRI1* encodes an AP2/ERF-  
366 binding protein and *wri1* seeds have about 80% reduction in oil content relative to the wild type  
367 seeds (Ruuska et al., 2002). Genetic and molecular analysis revealed that WRI1 functions  
368 downstream of LEC1 (Baud et al., 2007). Along with WRI1 itself, six other TFs are part of this  
369 module, including AT2G21530, a zinc finger (C2H2) protein (AT3G02970), NF-YB3  
370 (AT4G14540), PLT3 (AT5G10510), GIF1 (AT5G28640) and PLT7 (AT5G65510).

### 371 **Modules for Seed Coat development**

372 The seed coat has important functions in protecting the embryo from pathogen attack and  
373 mechanical stress. The seed coat encases the dormant seed until germination and maintains the  
374 dehydrated state by being impermeable to water. M0034 is comprised of 149 genes with the  
375 highest expression in general, and specifically in chalazal seed coat relative to other tissues (Fig.  
376 6C). This module is enriched with genes annotated under the GO BP terms “phenylpropanoid  
377 biosynthetic process” (GO:0009699) and “flavonoid biosynthesis process” (GO: 0009813). The  
378 AP2/B3-like TF AT3G46770 is highly expressed in seed coat (Supplemental Fig. S5A) and  
379 predicted as the top regulator in this module. B3 domain TFs are well known for functioning  
380 during seed development and transition into dormancy in *Arabidopsis* (Suzuki and McCarty,  
381 2008) and, to some extent, their functions are conserved in cereals (Grimault et al., 2015). The  
382 seed-coat-specific expression of AT3G46770 is a compelling incentive for testing AT3G46770  
383 mutants for seed-related phenotypes, which to the best of our knowledge, has never been  
384 considered. There were 21 other TFs belonging to this module, of which six are part of the MYB  
385 family. TRANSPARENT TESTA 2 (TT2), a MYB family regulator of flavonoid synthesis (Nesi  
386 et al., 2001), was ranked fourth in our predictions for this module.

387 M0071 is composed of 77 genes encoding, surprisingly, only 3 TFs, ERF38  
388 (AT2G35700), BEL1-LIKE HOMEODOMAIN 1 (BLH1, AT2G35940) and a C2H2 super  
389 family protein (AT3G49930). This module is enriched with genes involved in “xylan metabolic  
390 process” (GO:0045491), “cell wall biogenesis” (GO:0009834), and “carbohydrate biosynthetic  
391 process” (GO:0016051). KANADI3/KAN3 (AT4G17695) was predicted as the top regulator of  
392 this module. KANADI group of functionally redundant TFs (KAN1, 2, and 3) has been shown to  
393 play roles in modulating auxin signaling during embryogenesis and organ polarity (Eshed et al.,  
394 2004; McAbee et al., 2006; Izhaki and Bowman, 2007). In the case of another KANADI TF,

395 KAN4, encoded by the *ABERRANT TESTA SHAPE* gene, the lack of the KAN4 protein resulted  
396 in congenital integument fusion (McAbee et al., 2006). It is reasonable to hypothesize that  
397 KAN3 could be acting in a redundant manner with KAN4 to regulate seed coat formation during  
398 late stages of maturation, as the expression pattern of *KAN3* is higher in seed coat than in other  
399 organs or cell types (Supplemental Fig. S5B).

#### 400 **Module M0006 is related to seed desiccation tolerance**

401 M0006 is comprised of 220 genes expressed predominantly during the mature green stage (Fig.  
402 7A), and enriched with genes involved in “response to abscisic acid stimulus” (GO:0009737),  
403 “response to water” (GO:0009415) and terms related to embryonic development (GO:0009793),  
404 altogether suggesting an involvement of these genes in acquisition of desiccation tolerance (DT).  
405 We predicted AGL67 (AT1G77950) as a major regulator of this module, among 23 other TFs  
406 that are part of this module (Fig. 7B). AGL67 has been recently confirmed as a major TF  
407 involved in acquisition of DT (González-Morales et al., 2016), validating our prediction.  
408 Additionally, the authors of this study analyzed the mutants of 16 genes (TFs and non-TFs) that  
409 had reduced germination percentage, of which 12 are in our network and 7 of these are a part of  
410 M0006. These 7 genes include PIRL8 (AT4G26050), ERF23 (AT1G01250), OBAP1A  
411 (AT1G05510), DREB2D (AT1G75490), AT1G77950 (AGL67), AT2G19320 and MSRB6  
412 (AT4G04840).

413

#### 414 **Characteristics of seed-specific networks**

415 The primary objective of this network analysis pipeline was to capture gene regulation  
416 information in a tissue-specific manner. To examine the effect of this approach and to identify  
417 the distinguishing characteristics of the seed regulatory network that differed from a global  
418 network (non-tissue specific regulatory network), we extended the seed expression compendium  
419 to incorporate an additional set of 140 datasets related to profiling gene expression from various  
420 organs of the *Arabidopsis* plant, including vegetative and seedling growth stages. Using the same  
421 reverse engineering approach as described above, we scored each TF-target pair on this extended  
422 expression compendium (EEC). Next, to delineate the distinguishing properties of seed  
423 networks, we compared the level of co-regulation induced by TFs, measured as similarity in the



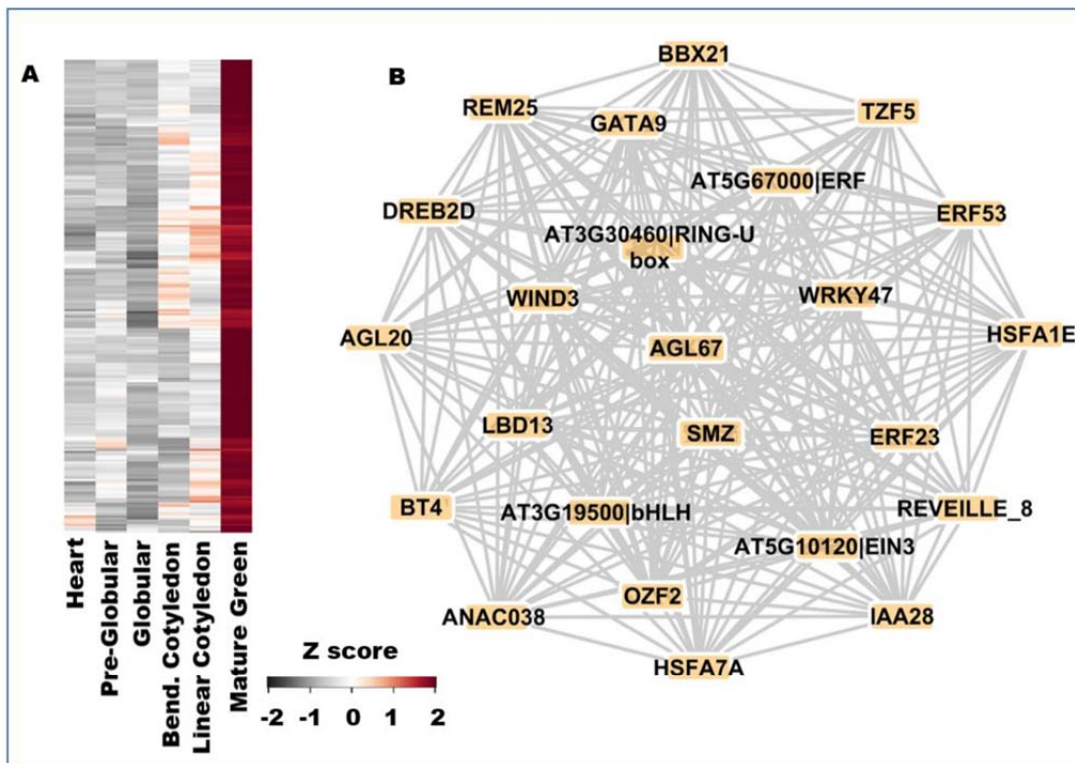

**Figure 7: Module M0006.** A) Expression patterns of genes in module M0006. Seed development stages are represented as columns and genes as rows. Gene names are hidden for ease in visualization. B) Coexpression links between TFs in M0006. Nodes are labeled according to their corresponding gene symbols if present in TAIR, else labeled with their corresponding locus ID and the family the protein belongs to.

424 predicted targets of each TF-pair, using Jaccard's coefficient (JC), in both the seed-specific  
425 network and the global regulatory network created using EEC. As expected, a larger number of  
426 TFs have very few common targets, and this number is high for fewer TFs in both the networks

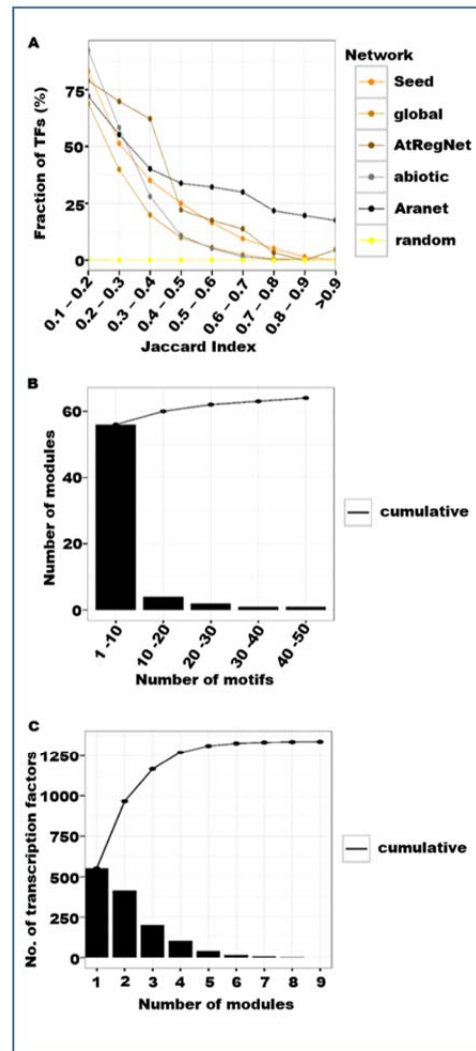

**Figure 8: Characteristics of seed networks.** **A)** Comparison of the fraction of TFs possibly coregulating the same sets of genes, evaluated using the Jaccard's Index (JI) of overlap between the predicted targets of each TF-pair, for 5 different regulatory networks and a random network. **B)** A histogram showing bins of number of motifs significantly over-represented in the promoters of genes within each module in TF-MAN. **C)** Distribution of TF-module edges in SANE follows a scale-free topology, with a large number of regulators associated with fewer modules, and a few regulators (e.g., NAP57, KAN3) associated with a large number of modules.

427 (Fig. 8A). A larger number of TFs have similar targets in the seed network at any given JC bin,  
 428 as compared to the global network.

429           Although false positives and false negatives are part of any network based predictions,  
430 we suspected that the trends observed in comparison of the seed-specific and the global network  
431 could be trivial if there were correlated errors arising from the same network prediction pipeline  
432 for both networks. To overcome this uncertainty, we downloaded and analyzed the recently  
433 published *Arabidopsis* oxidative stress gene regulatory network predicted from a compendium of  
434 microarrays conditioned on abiotic stress (Vermeirssen et al., 2014). This abiotic-stress specific  
435 network is essentially a consensus network of an ensemble of reverse engineering algorithms,  
436 and performed remarkably well in validations (Vermeirssen et al., 2014). We then computed the  
437 overlaps in the predicted targets of TFs in this network (as done for networks in this study) and  
438 observed that it follows a trend very similar to that of the global network (Fig. 8A), indicating  
439 that there was no major bias introduced by our approach.

440           To extend the comparisons, we performed the same operation to the *Arabidopsis thaliana*  
441 Regulatory Network (AtRegNet) and the AraNet (Lee et al., 2010). AtRegNet harbors about  
442 17,000 direct edges validated for TFs and their target genes. AraNet is a co-functional network  
443 derived by integrating 24 -omics datasets from multiple organisms in a machine-learning  
444 framework. Both networks showed a similar gradual decrease in fraction of TFs with similar  
445 targets with higher JC values (Fig. 8A), similar to trends observed in networks with a ‘functional  
446 context’ above. However, we used these networks for comparison only as a rough guide as the  
447 AraNet was not designed to prioritize regulatory interactions and holds only approximately  
448 60,000 such edges, and the AtRegNet harbors very few TFs when compared to those in our list.  
449 We assumed that both these limitations would make the analysis suffer from the extreme loss of  
450 transcriptional signal. However, the robustness of gene relationships predicted in the AraNet was  
451 clearly evident as more than 20% of the original TFs in the network presumably interacted even  
452 in the highest JC bin, larger than any other networks compared. Overall, the number of TFs  
453 observed at any given JC bin in all networks was significantly larger than in a random network.  
454 All TF-pairs with  $JC > 0.70$  (arbitrarily chosen stringency) from the seed-specific network were  
455 connected and visualized as a graph in Cytoscape (Shannon et al., 2003) revealing many  
456 connections supported by multiple networks (Supplemental Fig. S6)

457           About 59% of all genes (23% of all modules) in TMN have at least one known plant CRE  
458 enriched in their coexpression neighborhood, with a few modules harboring a large number of

459 different CREs (e.g., Photosynthesis module described earlier) (Fig. 8B). Approximately 45% of  
460 total edges in ASCN have an absolute PC score more than 0.9, indicating a highly cohesive  
461 network structured for a subtle developmental program.

462 For evaluation of ‘hubs’, we selected top 10 TF predictions for each active module in  
463 SANE (based on ranked association scores), and counted the number of modules associated with  
464 each TF. We observed that 41% of these TFs (552 out of 1339), likely regulate expression of  
465 genes in only one module each, while a single TF, NAP57 (AT3G57150), was predicted to be  
466 associated with the maximum number of modules (9 out of 120) (Fig. 8C). The *NAP57* gene  
467 encodes the Arabidopsis dyskerin homolog involved in maintaining telomerase activity (Kannan  
468 et al., 2008). As expected, 5 out of 9 modules containing genes whose expression is predicted to  
469 be regulated by NAP57 are enriched in GO BP terms such as “DNA metabolic process”,  
470 “ribonucleoprotein complex biogenesis”, “RNA processing” and “ribosome biogenesis”. This  
471 association was true even on the level of individual targets predictions for majority of the other  
472 seed-hubs, in both, the seed and global networks (Table 1), indicating that these TFs are  
473 responsible for perpetual regulation of important basic processes like biogenesis of cell  
474 components, maintenance of cell shape and structure, nucleic acid metabolism etc. A weak but  
475 significant enrichment was found between WRKY13 (AT4G39410), a biotic and abiotic stress  
476 regulator (Qiu et al., 2007; Xiao et al., 2013), and the GO term ‘immune system response’ only  
477 in the seed network.

#### 478 **The SANE webserver**

479 The data generated in this study are represented on a web-based interactive platform available at  
480 <https://plantstress-pereira.uark.edu/SANE/>. The platform allows users to investigate seed  
481 development in three different modes (Fig. 9): 1) Select modules with high expression in  
482 compartment – or stage-specific manner, 2) Using the ‘cluster enrichment tool’ to upload a  
483 differential expression profile (e.g. transcriptome of a TF mutant) and identify clusters that  
484 significantly perturb in their experiment and 3) enter the locus ID of a TF of interest to identify  
485 clusters that are likely regulated by that TF, enabling the user to gain an insight on its functional  
486 role prior to an *in vivo* validation. Furthermore, the webserver allows users to visualize the  
487 expression of resulting modules/clusters as publication-ready downloadable heatmaps, as well as  
488 plot gene connection graphs using Cytoscape (Lopes et al., 2010).

**SANE**  
The Seed Active Network in Arabidopsis

SANE is a **tissue-specific module-regulatory network** designed to identify **clusters** of genes that tightly coexpress during the development of **Arabidopsis seeds**, as well as identify the **Transcription Factors (TFs)** that functionally regulate these clusters. This platform allows users to **1)** explore modules of genes that express highly in different **seed compartments** at distinct **stages** of development, **2)** Upload a differentially expressed **transcriptome** (e.g. expression changes in a mutant genotype) to identify clusters that significantly perturb in the experiment and **3)** query a **TF** of interest to gain insights into its putative regulatory mechanism.

**Select modules active in:**  
globular embryo stage ▾  
Submit

**Cluster enrichment tool**  
[Upload a genome-wide differential expression profile]  
Choose File No file chosen  
Q-value threshold  0.05  0.01  0.001  
Submit Help

**Find regulons of a TF**  
[start typing a Locus ID in AGI format (AT^G...)]  
View  
Suggestions:

**Figure 9: Screenshot of the SANE webserver.**

The SANE web platform (<https://plantstress-pereira.ualr.edu/SANE/>) allows users to identify modules active in distinct seed compartments in different stages of development, upload a new transcriptome in the cluster enrichment tool that uses the parametric analysis to identify enriched modules, and find the regulons of a TF of interest.

489

490

## 491 **Discussion**

492 Plant seeds are complex structures and seed formation is perhaps the most important  
493 developmental phase of a plant life cycle, as it determines the fate of the next progeny. Distinct  
494 cell types and organs within a seed gradually develop during a period of 20-21 days after  
495 pollination in *Arabidopsis*. In addition, each organ is subjected to its own developmental  
496 program and has different, but equally important functions, from feeding and providing optimal  
497 growth conditions to protecting the embryo to ensure species propagation. These processes are  
498 tightly regulated by synergistically acting TFs (To et al., 2006).

499 We devised a new methodology that relies on existing statistical methods that are widely  
500 accepted, for the discovery of a modular regulatory network. Using a seed-tissue specific  
501 expression dataset, this method facilitated identification of modules of co-regulated genes, the  
502 corresponding development phases in which the modules express most, CREs that drive the  
503 biological functions encoded by the genes within modules, and TF regulators that likely govern  
504 the expression of the genes in the modules. Our method is limited to making functional  
505 predictions for TFs in a tissue-specific manner, and might not accurately predict individual  
506 targets of a given TF. This limitation is partly due to the use of a single data-type; a heterogenous  
507 approach should be undertaken (e.g. high-throughput DNA binding essays in conjunction with  
508 expression data) for studies aiming at specific individual targets. Nevertheless, the statistically  
509 significant functional associations predicted here are of superior quality, as seen in evidence  
510 from the literature, and can serve as the first step in selecting TFs for targeted downstream  
511 experiments. The network inference pipeline presented here can be used to enhance any  
512 coexpression based study.

513 Previous studies have reported a few seed-specific genes, including TFs (Le et al., 2010;  
514 Belmonte et al., 2013). We prioritized these genes in our network to derive an active subnetwork,  
515 referred to as Seed Active Network (SANE). We described selected modules containing genes  
516 with high expression in specific seed components, including embryo, endosperm and seed coat.  
517 We observed that, in most of the cases, the top predicted regulators of these modules are already  
518 known in the literature for their involvement in seed development, self-validating our approach.  
519 Several additional regulators are known to modulate other processes, including flower  
520 development, indicating conserved regulons of pre-fertilization events. Our results suggest that



521 associating regulators to gene sets with a shared function, as opposed to individual genes,  
522 provides biologically plausible predictions that are worth for validating *in planta* phenotypes  
523 using reverse genetics. As a community resource, our network is accessible through an online  
524 platform supported with query driven tools to enable a network based discovery of seed  
525 regulatory mechanisms.

526         It appears that during seed development, photosynthesis and storage compound synthesis  
527 is tightly coordinated by several regulators acting coordinately. This was evident from CRE  
528 enrichment analysis, as two complementary methods detected the module annotated for  
529 photosynthesis and related processes (M0011) harboring genes with the largest number of known  
530 plant motifs in their promoters when compared to the rest of the modules. Coordinate regulation  
531 of photosynthetic carbon metabolism has been shown previously (Bailey et al., 2007;  
532 Ambavaram et al., 2014). Our analysis reveals that much of the processes related to embryo  
533 development are conserved throughout the plant life cycle such as cell division and  
534 differentiation, as observed by similar roles of regulatory genes in developing embryos and roots.  
535 However, plants have developed intrinsic mechanisms that can modulate gene activity in  
536 specialized cells, perhaps as duplicated genes with similar functional roles. Such a phenomenon  
537 was evident in the case of two TF genes, *NTM1* and *NTM2* that are in close proximity to each  
538 other and possibly have similar biological roles in distinct parts of a plant.

539         The data generated by our work has the potential to further our knowledge of  
540 fundamental processes that regulate diverse specific aspects of seed development in *Arabidopsis*  
541 and can be extrapolated to related agriculturally important crops due to conservation of these  
542 basic processes (Magallón and Sanderson, 2002; Comparot-Moss and Denyer, 2009; Vriet et al.,  
543 2010). Based on our results, a cell- and developmental stage-specific network inference provides  
544 superior quality of predictions in the context of known information. Our network analysis  
545 pipeline can be further used to systematically increase this information-base for a variety of plant  
546 organs (e.g., parts from a post-germination stage network). Comparisons of different stage/tissue  
547 specific networks will throw light on the changing molecular mechanisms of a cell and reveal  
548 differentially modulated transcriptional networks during different growth stages.

549



## 550 **Materials and Methods**

### 551 **Gene expression quantification**

552 Affymetrix ATH1 Arabidopsis gene expression data was downloaded from GEO, and 6 datasets  
553 were selected from the super series labeled GSE12404 for seed expression compendium. In  
554 addition, 140 other datasets were used in the EEC (Supplemental Data S7). All datasets were  
555 individually processed in R Bioconductor using a custom CDF file for Arabidopsis (Harb et al.,  
556 2010). The re-annotated CDF assigns probe-sets to specific genes and increases the accuracy in  
557 expression quantification. Using Robust Multi-array average algorithm (RMA) (Irizarry et al.,  
558 2003), probe level expression values were background corrected, normalized and summarized  
559 into gene level expression values. Values from replicate arrays were then averaged and  
560 assembled in an integrated expression matrix of genes as rows and samples as columns, with  
561 each cell in the matrix representing log transformed expression value of genes in the  
562 corresponding samples. This procedure resulted in two expression matrices: a seed-specific  
563 expression matrix and a global expression matrix.

### 564 **Coexpression network and cluster identification**

565 Pearson's Correlation (PC) were calculated for each gene pair using expression values in both  
566 gene expression matrices. PCs were Fisher Z transformed and standardized to a  $N(0,1)$   
567 distribution, where a Z-score of a gene-pair represents the number of standard deviations the  
568 score lies away from the mean (Huttenhower et al., 2006). The following procedure was applied  
569 only to the seed network. Gene pairs with Z scores above 1.96 (PC 0.75) were retained and  
570 connected to create a coexpression network with 21,267 genes connected with approximately 7.6  
571 million edges. SPICi, a fast clustering algorithm (Jiang and Singh, 2010), was used to cluster the  
572 network at a range of  $T_d$  values ranging from 0.1 to 0.90, keeping a minimum cluster size of 3.  
573 Each  $T_d$  value was evaluated on three criteria: i) total number of clusters yielded and the fraction  
574 of original genes retained in those clusters ii) average modularity following the (Newman and  
575 Girvan, 2004) algorithm and iii) functional coherence of clusters based on GO BP term  
576 annotations. At  $T_d$  0.80, expression values of each gene within each of 1563 clusters were  
577 averaged across the same parts of the seed and in different developmental stages, resulting in two

578 expression profiles for each module. Expression values were scaled and plotted as heatmaps in R  
579 using the gplots package (<https://CRAN.R-project.org/package=gplots>).

### 580 **Functional annotations of coexpression clusters**

581 The TAIR gene association file was downloaded from the plant GSEA website  
582 (<http://structuralbiology.cau.edu.cn/PlantGSEA/download.php>) (Yi et al., 2013). The .gmt files  
583 were filtered to remove generic terms that annotate more than 500 genes, and the remaining list  
584 of terms in the BP category were used for testing overlaps with clusters. The significance of  
585 overlap of a target gene set (e.g. a cluster) with BP terms was calculated using a cumulative  
586 hypergeometric test. The p-values obtained were adjusted for false discovery rate and converted  
587 to qvalues using the Benjamini-Hochberg method (Benjamini and Hochberg, 1995). Enrichment  
588 scores were reported as  $(-1) * \log(qvalue)$ .

589

590

### 591 **Analysis of known CREs**

592 We used a pattern-based method to search for CREs over-represented in the promoters of co-  
593 regulated genes. First, all known plant motifs were identified from PLACE (Higo et al., 1999)  
594 and AGRIS databases (Palaniswamy et al., 2006). Subsequently, 1000-bp upstream promoter  
595 regions of all Arabidopsis genes were downloaded from TAIR and scanned for occurrence of  
596 these motifs using DNA-pattern matching tool (Medina-Rivera et al., 2015), yielding a list of  
597 403 motifs present at least once in the promoters of ~17000 genes. A few of these motifs,  
598 perhaps involved in functions common to all the promoters, are ubiquitously present in almost all  
599 the genes. To detect a reliable presence-absence signal in the context of our analysis, we  
600 removed motifs that were found in more than 50% of all the genes considered in the network.  
601 Thus, a list of 341 unique motifs were used for enrichment (overlap) analysis using a  
602 hypergeometric test as described above.

### 603 **Module Regulatory Network analysis**

604 A list of 1921 Arabidopsis TF regulators was curated from the Plant Transcription Factor  
605 Database, the AGRIS database and the Database of Arabidopsis Transcription Factors (Guo et

606 al., 2005; Yilmaz et al., 2011; Jin et al., 2014). For every TF-gene pair, a Z score representing  
607 specific correlation score was calculated using the CLR algorithm (Faith et al., 2007). The  
608 Parametric Analysis of Geneset Enrichment (PAGE) algorithm (Kim and Volsky, 2005) was  
609 used to evaluate enrichment of CLR scored targets of each TF within each module. P-values  
610 were calculated from Z scores of enrichment and corrected for FDR using the Benjamini and  
611 Hochberg procedure (Benjamini and Hochberg, 1995).

## 612 **Global regulatory network and comparison of different networks**

613 A global regulatory network was constructed the same way as the seed-specific network, except  
614 that EEC of 140 datasets was used. The Arabidopsis abiotic stress regulatory network was  
615 obtained from (Vermeirssen et al., 2014). Information on interactions reported in AtRegNet and  
616 AraNet was downloaded from <http://arabidopsis.med.ohio-state.edu/downloads.html> and  
617 <http://www.functionalnet.org/aranet/download.html>, respectively. Regulatory interactions (edges  
618 with at least one node as a regulator from our list) were identified from AraNet. For all three  
619 externally downloaded networks described above, and the global and seed-specific networks  
620 from this study, Jaccard coefficient (JC) of overlap in the predicted targets of each regulator pair  
621 was calculated using a perl script. JC scores were binned and the fraction of regulators retained  
622 from the original individual network within each bin was plotted in R. The random network was  
623 created by preserving the node degree and randomly reshuffling all the edges of the seed  
624 network.

625 Network data was parsed using the Sleipnir library (Huttenhower et al., 2008), Network Analysis  
626 Tools (NeAT) (Brohee et al., 2008) and scripts written in R and perl.

627

## 628 **Author Contributions**

629 C.G. and A.K. conceived the computational procedure. C.G. designed the network, conducted  
630 statistical analysis and drafted the manuscript. A.K. provided data. E.C. interpreted the results  
631 and contributed text. A.P. designed the experiments and coordinated research. C.G. created the  
632 webserver with contributions from P.W. All authors contributed to writing the manuscript.

633

## 634 Acknowledgements

635 This work was supported by the NSF grant award MCB-1052145 “A Systems Biology Approach  
636 to Cellular Regulation of Seed Filling”

637

## 638 Figure Legends

639 **Figure 1: Pipeline for tissue-specific module regulatory network analysis.** Two separate  
640 Arabidopsis gene expression compendiums (EC) were created: one from a seed-specific  
641 expression data series (GSE12404) and one from non-tissue-specific (global) 140 expression  
642 datasets. Datasets in both the EC were normalized individually using RMA algorithm in R. Z  
643 scores of Pearson’s Correlations (PC) were calculated for all gene-pairs in both the EC. From  
644 seed EC, gene pairs with  $PC > 0.73$  ( $Z > 1.96$ ) were connected to create the Arabidopsis Seed  
645 coexpression network (ASCN). ASCN was then clustered using SPICi at a range of clustering  
646 thresholds ( $T_d$ ), and an optimal clustering parameter was chosen based on genome coverage and  
647 coherence of genes as a functional group. 1563 clusters obtained at  $T_d$  0.80 were tested for  
648 enrichment of biological processes from the gene ontology and known plant *cis* regulatory  
649 elements for multiple databases. A list of 1921 TFs was supplied to the CLR (context likelihood  
650 of relatedness) algorithm to predict their targets in both the EC. In the seed EC, the PAGE  
651 algorithm was used to score the enrichment of CLR-weighted targets in the ASCN clusters, and a  
652 TF-module association network was created. The network was queried with a list of genes  
653 expressed predominantly in the seed as compared to other organs/tissues, and the Seed Active  
654 Network or SANe, was derived. Simultaneously, the seed-specific network was compared with  
655 the network created using the global EC and multiple other Arabidopsis regulatory networks  
656 downloaded from published studies.

657

658 **Figure 2: Evaluation of clustering threshold ( $T_d$ ).** Genes from the Arabidopsis seed  
659 coexpression network were clustered at a range of  $T_d$  values shown on the X axis of all the  
660 figures. Each  $T_d$  was examined by: A) A genome coverage plot measuring the number of clusters  
661 yielded and the fraction of original genes retained (orange line corresponding orange Y axis). B)  
662 Boxplots showing average edge segregation of all the clusters, indicating overall modularity of

663 the network within each  $T_d$ . C) A plot showing number of clusters enriched with at least one BP  
664 term and the total number of BP terms retained (orange line corresponding orange Y axis) and D)  
665 Boxplots summarizing the enrichment scores  $[-1*\log(\text{FDR})]$  of the hypergeometric p-values  
666 obtained by BP-cluster overlap analysis.

667

668 **Figure 3: TF-Module Association Network (TMN).** A) Heatmap representing association  
669 scores of 1819 TFs as regulators in the rows, and 10526 genes grouped into 278 coexpression  
670 modules represented along the columns. Each grid in the heatmap is color coded according to the  
671 level of enrichment of predicted targets of each TF regulator in the corresponding module. The  
672 red gradient indicates a positive score and grey indicates a negative score, estimated using the  
673 PAGE algorithm. The seed compartment in which the module has maximum expression is color-  
674 coded and represented on top of the heatmap (first row), where CE is chalazal endosperm, ME is  
675 micropylar endosperm, PE is peripheral endosperm, CSC and GSC is chalazal and general seed  
676 coat, respectively, and EP is embryo proper. The development stage in which the module has  
677 maximum expression is color-coded and represented on top of the heatmap (second row), where  
678 bc is bending cotyledon, lc is linear cotyledon, pgs is pre-globular stage, ges is globular embryo  
679 stage, hs is heart stage and mg is mature green stages. B) Predictions for each of the 278 modules  
680 were ranked and the top 5 predicted regulators for each module were visualized as a network  
681 graph. Each grey circle in the network plot is a TF and each orange circle is a module. The size  
682 of the grey circle is proportional to the out-going degree of the TF. Size of the orange circle was  
683 set to a constant, except for 9 bigger circles showing the modules described later in the main text.  
684 The network was visualized using Cytoscape version 3.3.0. Node names are hidden for ease in  
685 visualization. The cytoscape sessions file is provided as supplemental data S3, which can be  
686 loaded into Cytoscape for node names and further exploration of the network. The heatmap was  
687 drawn using gplots package in the R statistical computing environment.

688 **Figure 4: Heatmap representation of a subset of the SANE.** Modules with high relative  
689 expression in embryo, endosperm and seed coat regions were extracted from SANE. Modules are  
690 shown in columns and for each module, the top 5 predicted TF regulators are shown in rows.  
691 Each grid in the heatmap is colored according to the association score estimated using the PAGE  
692 algorithm. Positive and negative scores are shaded in red or black gradient, respectively, as

693 indicated by the color key. Literature identified TFs with validated seed-specific phenotypes or  
694 phenotypes observed in other reproductive stages/tissues are marked with a red ellipse or a  
695 yellow ellipse, respectively. CRE, cell-type and functional annotations for each module are  
696 shown above the heatmap (top three rows; colored boxes). Modules annotated for embryo,  
697 endosperm and seed coat are indicated in blue, green and brown boxes, respectively, in the  
698 middle row. CRE and functional annotation for each module is color-coded uniquely in the top  
699 and bottom rows, respectively.

700 **Figure 5: Visualization of seed modules.** A graphical representation of seed coexpression  
701 modules. Each circle represents a gene. Each module is color coded uniquely. Modules are  
702 grouped according to the seed compartments (indicated by horizontal or vertical lines and text  
703 boxes), and labelled with the BP term most highly over-represented within each module. Genes  
704 are left unlabeled to facilitate visualization. The network was drawn in Cytoscape version 3.3.0. .

705 **Figure 6: Expression profiling of gene modules.** Expression patterns of modules in embryo,  
706 endosperm and seed coat regions represented as heatmaps in A), B), and C), respectively. Seed  
707 compartments are represented as columns and genes as rows. Gene names are hidden for ease in  
708 visualization. Expression values of genes in each module were averaged across samples from the  
709 same tissue-type/seed-compartment (embryo, endosperm and seed coat). Average expression  
710 values were scaled and represented as a Z score in the heatmaps. Red indicates higher expression  
711 of a gene in a particular compartment and black gradient indicates lower expression relative to  
712 other compartments.

713 **Figure 7: Module M0006.** A) Expression patterns of genes in module M0006. Seed  
714 development stages are represented as columns and genes as rows. Gene names are hidden for  
715 ease in visualization. B) Coexpression links between TFs in M0006. Nodes are labeled according  
716 to their corresponding gene symbols if present in TAIR, else labeled with their corresponding  
717 locus ID and the family the protein belongs to.

718 **Figure 8: Characteristics of seed networks.** A) Comparison of the fraction of TFs possibly co-  
719 regulating the same sets of genes, evaluated using the Jaccard's Index (JI) of overlap between the  
720 predicted targets of each TF-pair, for 5 different regulatory networks and a random network. B)  
721 A histogram showing bins of number of motifs significantly over-represented in the promoters of  
722 genes within each module in TF-MAN. C) Distribution of TF-module edges in SANe follows a

723 scale-free topology, with a large number of regulators associated with fewer modules, and a few  
724 regulators (e.g., NAP57, KAN3) associated with a large number of modules.

725

726



## 727 Tables

728 Table 1: **Regulatory hubs of seed development.** 23 regulators (transcription factors) that were found associated  
 729 with the largest number of coexpressed modules in SANe were selected and listed in descending order according to  
 730 the number of modules they regulate. Targets of these regulators in the seed and the global network, with absolute Z  
 731 score > 3 were selected and tested for overlaps with BP terms in the GO database. The score columns represent (-1)  
 732 \* log (q-value) values from a cumulative hypergeometric test of enrichment. Only the most highly scored gene sets  
 733 are reported in the table.

| Network                | Seed                                    |                  | Global                                  |                  |
|------------------------|-----------------------------------------|------------------|-----------------------------------------|------------------|
|                        | Biological Process                      | Enrichment Score | Biological Process                      | Enrichment Score |
| NAP57<br>AT3G57150     | ribonucleoprotein<br>complex biogenesis | 57.05            | ribosome<br>biogenesis                  | 72.07            |
| HDT3<br>(AT5G03740)    | ribonucleoprotein<br>complex biogenesis | 45.50            | ribonucleoprotein<br>complex biogenesis | 71.39            |
| AT4G37130              | ribonucleoprotein<br>complex biogenesis | 40.00            | RNA metabolism                          | 35.36            |
| EMB2746<br>(AT5G63420) | ribonucleoprotein<br>complex biogenesis | 56.44            | RNA metabolism                          | 29.30            |
| C3H<br>(AT5G60820)     | ribonucleoprotein<br>complex biogenesis | 12.97            | vesicle-mediated<br>transport           | 10.38            |
| JMJ22<br>(AT5G06550)   | ribonucleoprotein<br>complex biogenesis | 36.76            | ribosome<br>biogenesis                  | 75.24            |
| WRKY13<br>(AT4G39410)  | immune system<br>process                | 3.04             | N.D                                     | NA               |
| TFIIIA<br>(AT1G72050)  | ribosome biogenesis                     | 49.90            | RNA metabolism                          | 49.30            |
| VOZ1<br>(AT1G28520)    | ribosome biogenesis                     | 13.30            | cellular biopolymer<br>catabolism       | 4.77             |
| NFD1<br>(AT4G30930)    | ribonucleoprotein<br>complex biogenesis | 71.39            | ribosome<br>biogenesis                  | 75.24            |

|                          |                                          |       |                                                                           |       |
|--------------------------|------------------------------------------|-------|---------------------------------------------------------------------------|-------|
| KAN3<br>(AT4G17695)      | jasmonic acid<br>biosynthesis            | 4.64  | response to<br>salicylic acid<br>stimulus                                 | 2.95  |
| HDT1<br>(AT3G44750)      | ribonucleoprotein<br>complex biogenesis  | 41.25 | ribosome<br>biogenesis                                                    | 72.44 |
| HAT3.1<br>(AT3G19510)    | RNA metabolism                           | 7.88  | RNA metabolism                                                            | 20.48 |
| FZF<br>(AT2G24500)       | RNA metabolism                           | 23.67 | ribosome<br>biogenesis                                                    | 68.91 |
| IAA8<br>(AT2G22670)      | polysaccharide<br>metabolism             | 5.33  | transmembrane<br>receptor protein<br>tyrosine kinase<br>signaling pathway | 10.47 |
| SMAD/FHA<br>(AT2G21530)  | photosynthesis                           | 54.25 | photosynthesis                                                            | 68.43 |
| AT1G78280                | cellular biopolymer<br>metabolism        | 5.88  | ribosome<br>biogenesis                                                    | 8.46  |
| ZFP4<br>(AT1G66140)      | N.D.                                     | N.A.  | ion transport                                                             | 4.40  |
| TRB1<br>(AT1G49950)      | maintenance of root<br>meristem identity | 2.33  | protein<br>modification                                                   | 6.33  |
| SEUSS<br>(AT1G43850)     | microtubule-based<br>process             | 2.71  | negative regulation<br>of gene expression                                 | 8.25  |
| NAC017<br>(AT1G34190)    | vesicle-mediated<br>transport            | 4.70  | vesicle-mediated<br>transport                                             | 11.55 |
| ATU2AF35A<br>(AT1G27650) | RNA metabolism                           | 20.60 | RNA metabolism                                                            | 15.07 |
| AT1G17520                | proteolysis                              | 3.39  | RNA metabolism                                                            | 12.81 |

## Parsed Citations

- Albert R (2005) Scale-free networks in cell biology. *Journal of Cell Science* 118: 4947  
Preprint doi: <https://doi.org/10.1101/165894>; this version posted July 20, 2017. The copyright holder for this preprint (which was not certified by peer review) is the author/funder, who has granted bioRxiv a license to display the preprint in perpetuity. It is made available under aCC-BY-NC-ND 4.0 International license.
- Pubmed: [Author and Title](#)  
CrossRef: [Author and Title](#)  
Google Scholar: [Author Only](#) [Title Only](#) [Author and Title](#)
- Allotent G, Osorio S, Ly Vu J, Falconet D, Jouhet J, Kuntz M, Fernie AR, Lerbs-Mache S, Macherel D, Courtois F, Finazzi G (2015) Adjustments of embryonic photosynthetic activity modulate seed fitness in *Arabidopsis thaliana*. *New Phytologist* 205: 707-719
- Pubmed: [Author and Title](#)  
CrossRef: [Author and Title](#)  
Google Scholar: [Author Only](#) [Title Only](#) [Author and Title](#)
- Ambavaram MM, Krishnan A, Trijatmiko KR, Pereira A (2011) Coordinated activation of cellulose and repression of lignin biosynthesis pathways in rice. In *Plant Physiol*, Vol 155, United States, pp 916-931
- Pubmed: [Author and Title](#)  
CrossRef: [Author and Title](#)  
Google Scholar: [Author Only](#) [Title Only](#) [Author and Title](#)
- Ambavaram MMR, Basu S, Krishnan A, Ramegowda V, Batlang U, Rahman L, Baisakh N, Pereira A (2014) Coordinated regulation of photosynthesis in rice increases yield and tolerance to environmental stress. *Nat Commun* 5
- Pubmed: [Author and Title](#)  
CrossRef: [Author and Title](#)  
Google Scholar: [Author Only](#) [Title Only](#) [Author and Title](#)
- Aoki Y, Okamura Y, Tadaka S, Kinoshita K, Obayashi T (2016) ATTED-II in 2016: A Plant Coexpression Database Towards Lineage-Specific Coexpression. *Plant Cell Physiol* 57: e5
- Pubmed: [Author and Title](#)  
CrossRef: [Author and Title](#)  
Google Scholar: [Author Only](#) [Title Only](#) [Author and Title](#)
- Bailey KJ, Gray JE, Walker RP, Leegood RC (2007) Coordinate Regulation of Phosphoenolpyruvate Carboxylase and Phosphoenolpyruvate Carboxykinase by Light and CO<sub>2</sub> during C<sub>4</sub> Photosynthesis. *Plant Physiology* 144: 479-486
- Pubmed: [Author and Title](#)  
CrossRef: [Author and Title](#)  
Google Scholar: [Author Only](#) [Title Only](#) [Author and Title](#)
- Barrett T, Troup DB, Wilhite SE, Ledoux P, Rudnev D, Evangelista C, Kim IF, Soboleva A, Tomashevsky M, Edgar R (2007) NCBI GEO: mining tens of millions of expression profiles-database and tools update. *Nucl Acids Res* 35
- Pubmed: [Author and Title](#)  
CrossRef: [Author and Title](#)  
Google Scholar: [Author Only](#) [Title Only](#) [Author and Title](#)
- Basso K, Margolin AA, Stolovitzky G, Klein U, Dalla-Favera R, Califano A (2005) Reverse engineering of regulatory networks in human B cells. *Nat Genet* 37: 382-390
- Pubmed: [Author and Title](#)  
CrossRef: [Author and Title](#)  
Google Scholar: [Author Only](#) [Title Only](#) [Author and Title](#)
- Baud S, Mendoza MS, To A, Harscoet E, Lepiniec L, Dubreucq B (2007) WRINKLED1 specifies the regulatory action of LEAFY COTYLEDON2 towards fatty acid metabolism during seed maturation in *Arabidopsis*. *Plant J* 50: 825-838
- Pubmed: [Author and Title](#)  
CrossRef: [Author and Title](#)  
Google Scholar: [Author Only](#) [Title Only](#) [Author and Title](#)
- Belmonte MF, Kirkbride RC, Stone SL, Pelletier JM, Bui AQ, Yeung EC, Hashimoto M, Fei J, Harada CM, Munoz MD, Le BH, Drews GN, Brady SM, Goldberg RB, Harada JJ (2013) Comprehensive developmental profiles of gene activity in regions and subregions of the *Arabidopsis* seed. *Proceedings of the National Academy of Sciences* 110: E435-E444
- Pubmed: [Author and Title](#)  
CrossRef: [Author and Title](#)  
Google Scholar: [Author Only](#) [Title Only](#) [Author and Title](#)
- Benjamini Y, Hochberg Y (1995) Controlling the False Discovery Rate: A Practical and Powerful Approach to Multiple Testing. *Journal of the Royal Statistical Society. Series B (Methodological)* 57: 289-300
- Pubmed: [Author and Title](#)  
CrossRef: [Author and Title](#)  
Google Scholar: [Author Only](#) [Title Only](#) [Author and Title](#)
- Boutillier K, Offringa R, Sharma VK, Kieft H, Ouellet T, Zhang L, Hattori J, Liu C-M, van Lammeren AAM, Miki BLA, Custers JBM, van Lookeren Campagne MM (2002) Ectopic Expression of BABY BOOM Triggers a Conversion from Vegetative to Embryonic Growth. *The Plant Cell* 14: 1737-1749
- Pubmed: [Author and Title](#)  
CrossRef: [Author and Title](#)  
Google Scholar: [Author Only](#) [Title Only](#) [Author and Title](#)
- Brohee S, Faust K, Lima-Mendez G, Sand O, Janky R, Vanderstocken G, Deville Y, van Helden J (2008) NeAT: a toolbox for the analysis of biological networks, clusters, classes and pathways. *Nucleic Acids Res* 36: W444-451
- Pubmed: [Author and Title](#)  
CrossRef: [Author and Title](#)

Google Scholar: [Author Only](#) [Title Only](#) [Author and Title](#)

**Castillo-Davis CI, Hartl DL (2003) GeneMerge--post-genomic analysis, data mining, and hypothesis testing. *Bioinformatics* 19: 891-892** bioRxiv preprint doi: <https://doi.org/10.1101/165894>; this version posted July 20, 2017. The copyright holder for this preprint (which was not certified by peer review) is the author/funder, who has granted bioRxiv a license to display the preprint in perpetuity. It is made available under aCC-BY-NC-ND 4.0 International license.  
PubMed: [Author and Title](#)  
CrossRef: [Author and Title](#)  
Google Scholar: [Author Only](#) [Title Only](#) [Author and Title](#)

**Chavez Montes RA, Coello G, Gonzalez-Aguilera KL, Marsch-Martinez N, de Folter S, Alvarez-Buylla ER (2014) ARACNe-based inference, using curated microarray data, of Arabidopsis thaliana root transcriptional regulatory networks. *BMC Plant Biol*, Vol 14, England, p 97**  
PubMed: [Author and Title](#)  
CrossRef: [Author and Title](#)  
Google Scholar: [Author Only](#) [Title Only](#) [Author and Title](#)

**Chen C, Grennan K, Badner J, Zhang D, Gershon E, Jin L, Liu C (2011) Removing Batch Effects in Analysis of Expression Microarray Data: An Evaluation of Six Batch Adjustment Methods. *PLoS ONE* 6: e17238**  
PubMed: [Author and Title](#)  
CrossRef: [Author and Title](#)  
Google Scholar: [Author Only](#) [Title Only](#) [Author and Title](#)

**Chen L-Q, Lin IW, Qu X-Q, Sosso D, McFarlane HE, Londoño A, Samuels AL, Frommer WB (2015) A Cascade of Sequentially Expressed Sucrose Transporters in the Seed Coat and Endosperm Provides Nutrition for the Arabidopsis Embryo. *The Plant Cell* 27: 607-619**  
PubMed: [Author and Title](#)  
CrossRef: [Author and Title](#)  
Google Scholar: [Author Only](#) [Title Only](#) [Author and Title](#)

**Childs KL, Davidson RM, Buell CR (2011) Gene Coexpression Network Analysis as a Source of Functional Annotation for Rice Genes. *PLoS ONE* 6: e22196**  
PubMed: [Author and Title](#)  
CrossRef: [Author and Title](#)  
Google Scholar: [Author Only](#) [Title Only](#) [Author and Title](#)

**Comparot-Moss S, Denyer K (2009) The evolution of the starch biosynthetic pathway in cereals and other grasses. *Journal of Experimental Botany* 60: 2481-2492**  
PubMed: [Author and Title](#)  
CrossRef: [Author and Title](#)  
Google Scholar: [Author Only](#) [Title Only](#) [Author and Title](#)

**Devaiah BN, Madhuvanathi R, Karthikeyan AS, Raghobama KG (2009) Phosphate Starvation Responses and Gibberellic Acid Biosynthesis Are Regulated by the MYB62 Transcription Factor in Arabidopsis. *Molecular Plant* 2: 43-58**  
PubMed: [Author and Title](#)  
CrossRef: [Author and Title](#)  
Google Scholar: [Author Only](#) [Title Only](#) [Author and Title](#)

**Eisen MB, Spellman PT, Brown PO, Botstein D (1998) Cluster analysis and display of genome-wide expression patterns. *Proceedings of the National Academy of Sciences* 95: 14863-14868**  
PubMed: [Author and Title](#)  
CrossRef: [Author and Title](#)  
Google Scholar: [Author Only](#) [Title Only](#) [Author and Title](#)

**Eshed Y, Izhaki A, Baum SF, Floyd SK, Bowman JL (2004) Asymmetric leaf development and blade expansion in Arabidopsis are mediated by KANADI and YABBY activities. *Development* 131: 2997-3006**  
PubMed: [Author and Title](#)  
CrossRef: [Author and Title](#)  
Google Scholar: [Author Only](#) [Title Only](#) [Author and Title](#)

**Fait A, Angelovici R, Less H, Ohad I, Urbanczyk-Wochniak E, Fernie AR, Galili G (2006) Arabidopsis Seed Development and Germination Is Associated with Temporally Distinct Metabolic Switches. *Plant Physiology* 142: 839-854**  
PubMed: [Author and Title](#)  
CrossRef: [Author and Title](#)  
Google Scholar: [Author Only](#) [Title Only](#) [Author and Title](#)

**Faith JJ, Hayete B, Thaden JT, Mogno I, Wierzbowski J, Cottarel G, Kasif S, Collins JJ, Gardner TS (2007) Large-Scale Mapping and Validation of Escherichia coli Transcriptional Regulation from a Compendium of Expression Profiles. *PLoS Biol* 5: e8**  
PubMed: [Author and Title](#)  
CrossRef: [Author and Title](#)  
Google Scholar: [Author Only](#) [Escherichia coli Transcriptional Regulation from a Compendium of Expression Profiles.&num=10&btnG=Search+Scholar&as\\_epq=&as\\_oq=&as\\_eq=&as\\_occt=any&as\\_publication=&as\\_yhi=&as\\_allsubj=all&hl=en&lr=&c2coff=1" target="\\_blank">Title Only](#) [Escherichia coli Transcriptional Regulation from a Compendium of Expression Profiles.&num=10&btnG=Search+Scholar&as\\_occt=any&as\\_sauthors=Faith&as\\_ylo=2007&as\\_allsubj=all&hl=en&c2coff=1" target="\\_blank">Author and Title](#)

**Faith JJ, Hayete B, Thaden JT, Mogno I, Wierzbowski J, Cottarel G, Kasif S, Collins JJ, Gardner TS (2007) Large-scale mapping and validation of Escherichia coli transcriptional regulation from a compendium of expression profiles. *PLoS Biol* 5**  
PubMed: [Author and Title](#)  
CrossRef: [Author and Title](#)  
Google Scholar: [Author Only](#) [Title Only](#) [Author and Title](#)

**Goffman FD, Alonso AP, Schwender J, Shachar-Hill Y, Ohlrogge JB (2005) Light enables a very high efficiency of carbon storage in**

**developing embryos of rapeseed. Plant Physiol 138: 2269-2279**

Pubmed: [Author and Title](#)

CrossRef: [Author and Title](#)

Google Scholar: [Author Only Title Only Author and Title](#)

bioRxiv preprint doi: <https://doi.org/10.1101/165894>; this version posted July 20, 2017. The copyright holder for this preprint (which was not certified by peer review) is the author/funder, who has granted bioRxiv a license to display the preprint in perpetuity. It is made available under aCC-BY-NC-ND 4.0 International license.

**Goffman FD, Ruckle M, Ohlrogge J, Shachar-Hill Y (2004) Carbon dioxide concentrations are very high in developing oilseeds. Plant Physiol Biochem 42: 703-708**

Pubmed: [Author and Title](#)

CrossRef: [Author and Title](#)

Google Scholar: [Author Only Title Only Author and Title](#)

**González-Morales SI, Chávez-Montes RA, Hayano-Kanashiro C, Alejo-Jacuinde G, Rico-Cambren TY, de Folter S, Herrera-Estrella L (2016) Regulatory network analysis reveals novel regulators of seed desiccation tolerance in Arabidopsis thaliana. Proceedings of the National Academy of Sciences 113: E5232-E5241**

Pubmed: [Author and Title](#)

CrossRef: [Author and Title](#)

Google Scholar: [Author Only Title Only Author and Title](#)

**Grimault A, Gendrot G, Chaignon S, Gilard F, Tcherkez G, Thévenin J, Dubreucq B, Depège-Fargeix N, Rogowsky PM (2015) Role of B3 domain transcription factors of the AFL family in maize kernel filling. Plant Science 236: 116-125**

Pubmed: [Author and Title](#)

CrossRef: [Author and Title](#)

Google Scholar: [Author Only Title Only Author and Title](#)

**Grossniklaus U, Vielle-Calzada JP, Hoepfner MA, Gagliano WB (1998) Maternal control of embryogenesis by MEDEA, a polycomb group gene in Arabidopsis. Science 280: 446-450**

Pubmed: [Author and Title](#)

CrossRef: [Author and Title](#)

Google Scholar: [Author Only Title Only Author and Title](#)

**Guo A, He K, Liu D, Bai S, Gu X, Wei L, Luo J (2005) DATF: a database of Arabidopsis transcription factors. Bioinformatics 21: 2568-2569**

Pubmed: [Author and Title](#)

CrossRef: [Author and Title](#)

Google Scholar: [Author Only Title Only Author and Title](#)

**Harb A, Krishnan A, Ambavaram MMR, Pereira A (2010) Molecular and Physiological Analysis of Drought Stress in Arabidopsis Reveals Early Responses Leading to Acclimation in Plant Growth. Plant Physiology 154: 1254-1271**

Pubmed: [Author and Title](#)

CrossRef: [Author and Title](#)

Google Scholar: [Author Only Title Only Author and Title](#)

**He L, Su C, Wang Y, Wei Z (2015) ATDOF5.8 protein is the upstream regulator of ANAC069 and is responsive to abiotic stress. Biochimie 110: 17-24**

Pubmed: [Author and Title](#)

CrossRef: [Author and Title](#)

Google Scholar: [Author Only Title Only Author and Title](#)

**Higo K, Ugawa Y, Iwamoto M, Korenaga T (1999) Plant cis-acting regulatory DNA elements (PLACE) database: 1999. Nucleic Acids Res 27: 297-300**

Pubmed: [Author and Title](#)

CrossRef: [Author and Title](#)

Google Scholar: [Author Only Title Only Author and Title](#)

**Husbands AY, Benkovics AH, Nogueira FTS, Lodha M, Timmermans MCP (2015) The ASYMMETRIC LEAVES Complex Employs Multiple Modes of Regulation to Affect Adaxial-Abaxial Patterning and Leaf Complexity[OPEN]. The Plant Cell**

Pubmed: [Author and Title](#)

CrossRef: [Author and Title](#)

Google Scholar: [Author Only Title Only Author and Title](#)

**Huttenhower C, Hibbs M, Myers C, Troyanskaya OG (2006) A scalable method for integration and functional analysis of multiple microarray datasets. Bioinformatics 22: 2890-2897**

Pubmed: [Author and Title](#)

CrossRef: [Author and Title](#)

Google Scholar: [Author Only Title Only Author and Title](#)

**Huttenhower C, Mutungu KT, Indik N, Yang W, Schroeder M, Forman JJ, Troyanskaya OG, Collier HA (2009) Detailing regulatory networks through large scale data integration. Bioinformatics 25: 3267-3274**

Pubmed: [Author and Title](#)

CrossRef: [Author and Title](#)

Google Scholar: [Author Only Title Only Author and Title](#)

**Huttenhower C, Schroeder M, Chikina MD, Troyanskaya OG (2008) The Sleipnir library for computational functional genomics. Bioinformatics 24: 1559-1561**

Pubmed: [Author and Title](#)

CrossRef: [Author and Title](#)

Google Scholar: [Author Only Title Only Author and Title](#)

**Huynh-Thu VA, Irrthum A, Wehenkel L, Geurts P (2010) Inferring Regulatory Networks from Expression Data Using Tree-Based Methods. PLoS ONE 5: e12776**

Pubmed: [Author and Title](#)

CrossRef: [Author and Title](#)

Google Scholar: [Author Only Title Only Author and Title](#)

bioRxiv preprint doi: <https://doi.org/10.1101/165894>; this version posted July 20, 2017. The copyright holder for this preprint (which was not certified by peer review) is the author/funder, who has granted bioRxiv a license to display the preprint in perpetuity. It is made available under aCC-BY-NC-ND 4.0 International license.

**Irizarry RA, Huber B, Collin F, Beazer-Barclay YD, van den Bulck S, Chen Y, Speed TP (2003) Exploration, normalization, and summaries of high density oligonucleotide array probe level data. Biostatistics 4: 249-264**

Pubmed: [Author and Title](#)

CrossRef: [Author and Title](#)

Google Scholar: [Author Only Title Only Author and Title](#)

**Izhaki A, Bowman JL (2007) KANADI and Class III HD-Zip Gene Families Regulate Embryo Patterning and Modulate Auxin Flow during Embryogenesis in Arabidopsis. The Plant Cell 19: 495-508**

Pubmed: [Author and Title](#)

CrossRef: [Author and Title](#)

Google Scholar: [Author Only Title Only Author and Title](#)

**Jia H, McCarty DR, Suzuki M (2013) Distinct Roles of LAFL Network Genes in Promoting the Embryonic Seedling Fate in the Absence of VAL Repression. Plant Physiology 163: 1293-1305**

Pubmed: [Author and Title](#)

CrossRef: [Author and Title](#)

Google Scholar: [Author Only Title Only Author and Title](#)

**Jiang P, Singh M (2010) SPICi: a fast clustering algorithm for large biological networks. Bioinformatics 26: 1105-1111**

Pubmed: [Author and Title](#)

CrossRef: [Author and Title](#)

Google Scholar: [Author Only Title Only Author and Title](#)

**Jin J, Zhang H, Kong L, Gao G, Luo J (2014) PlantTFDB 3.0: a portal for the functional and evolutionary study of plant transcription factors. Nucleic Acids Research 42: D1182-D1187**

Pubmed: [Author and Title](#)

CrossRef: [Author and Title](#)

Google Scholar: [Author Only Title Only Author and Title](#)

**Johnson CS, Kolevski B, Smyth DR (2002) TRANSPARENT TESTA GLABRA2, a Trichome and Seed Coat Development Gene of Arabidopsis, Encodes a WRKY Transcription Factor. The Plant Cell 14: 1359-1375**

Pubmed: [Author and Title](#)

CrossRef: [Author and Title](#)

Google Scholar: [Author Only Title Only Author and Title](#)

**Kannan K, Nelson AD, Shippen DE (2008) Dyskerin is a component of the Arabidopsis telomerase RNP required for telomere maintenance. Mol Cell Biol 28: 2332-2341**

Pubmed: [Author and Title](#)

CrossRef: [Author and Title](#)

Google Scholar: [Author Only Title Only Author and Title](#)

**Keith K, Kraml M, Dengler NG, McCourt P (1994) fusca3: A Heterochronic Mutation Affecting Late Embryo Development in Arabidopsis. The Plant Cell 6: 589-600**

Pubmed: [Author and Title](#)

CrossRef: [Author and Title](#)

Google Scholar: [Author Only Title Only Author and Title](#)

**Kim S-Y, Volsky DJ (2005) PAGE: Parametric Analysis of Gene Set Enrichment. BMC Bioinformatics 6: 144-144**

Pubmed: [Author and Title](#)

CrossRef: [Author and Title](#)

Google Scholar: [Author Only Title Only Author and Title](#)

**Kim Y-S, Kim S-G, Park J-E, Park H-Y, Lim M-H, Chua N-H, Park C-M (2006) A Membrane-Bound NAC Transcription Factor Regulates Cell Division in Arabidopsis. The Plant Cell 18: 3132-3144**

Pubmed: [Author and Title](#)

CrossRef: [Author and Title](#)

Google Scholar: [Author Only Title Only Author and Title](#)

**Kohler C, Hennig L, Bouveret R, Gheyselinck J, Grossniklaus U, Gruissem W (2003) Arabidopsis MSI1 is a component of the MEA/FIE Polycomb group complex and required for seed development. Embo j 22: 4804-4814**

Pubmed: [Author and Title](#)

CrossRef: [Author and Title](#)

Google Scholar: [Author Only Title Only Author and Title](#)

**Kwong RW, Bui AQ, Lee H, Kwong LW, Fischer RL, Goldberg RB, Harada JJ (2003) LEAFY COTYLEDON1-LIKE Defines a Class of Regulators Essential for Embryo Development. The Plant Cell 15: 5-18**

Pubmed: [Author and Title](#)

CrossRef: [Author and Title](#)

Google Scholar: [Author Only Title Only Author and Title](#)

**Langfelder P, Horvath S (2008) WGCNA: an R package for weighted correlation network analysis. BMC Bioinformatics 9: 559**

Pubmed: [Author and Title](#)

CrossRef: [Author and Title](#)

Google Scholar: [Author Only Title Only Author and Title](#)

**Lashbrooke JG, Cohen H, Levy-Samocho D, Tzfadia O, Panizel I, Zeisler V, Massalha H, Stern A, Trainotti L, Schreiber L, Costa F, Aharoni A (2016) MYB107 and MYB9 Homologs Regulate Suberin Deposition in Angiosperms. The Plant Cell**



Pubmed: [Author and Title](#)

CrossRef: [Author and Title](#)

Google Scholar: [Author Only](#) [Title Only](#) [Author and Title](#)

bioRxiv preprint doi: <https://doi.org/10.1101/165894>; this version posted July 20, 2017. The copyright holder for this preprint (which was not certified by peer review) is the author/funder, who has granted bioRxiv a license to display the preprint in perpetuity. It is made available under aCC-BY-NC-ND 4.0 International license.

Le BR, Ohtsuki CE, Bur AC, Wagmaster JA, Henry KF, Kwon H, Benfante W, Kimbrell R, Horvath S, Drews CM, Fischer RL, Okamoto JK, Harada JJ, Goldberg RB (2010) Global analysis of gene activity during Arabidopsis seed development and identification of seed-specific transcription factors. *Proceedings of the National Academy of Sciences* 107: 8063-8070

Pubmed: [Author and Title](#)

CrossRef: [Author and Title](#)

Google Scholar: [Author Only](#) [Title Only](#) [Author and Title](#)

Lee I, Ambaru B, Thakkar P, Marcotte EM, Rhee SY (2010) Rational association of genes with traits using a genome-scale gene network for *Arabidopsis thaliana*. *Nat Biotechnol* 28: 149-156

Pubmed: [Author and Title](#)

CrossRef: [Author and Title](#)

Google Scholar: [Author Only](#) [Title Only](#) [Author and Title](#)

Lopes CT, Franz M, Kazi F, Donaldson SL, Morris Q, Bader GD (2010) Cytoscape Web: an interactive web-based network browser. *Bioinformatics* 26

Pubmed: [Author and Title](#)

CrossRef: [Author and Title](#)

Google Scholar: [Author Only](#) [Title Only](#) [Author and Title](#)

Lotan T, Ohto M, Yee KM, West MA, Lo R, Kwong RW, Yamagishi K, Fischer RL, Goldberg RB, Harada JJ (1998) Arabidopsis LEAFY COTYLEDON1 is sufficient to induce embryo development in vegetative cells. *Cell* 93: 1195-1205

Pubmed: [Author and Title](#)

CrossRef: [Author and Title](#)

Google Scholar: [Author Only](#) [Title Only](#) [Author and Title](#)

Luerßen H, Kirik V, Herrmann P, Miséra S (1998) FUSCA3 encodes a protein with a conserved VP1/ABI3-like B3 domain which is of functional importance for the regulation of seed maturation in *Arabidopsis thaliana*. 15: 755-764

Pubmed: [Author and Title](#)

CrossRef: [Author and Title](#)

Google Scholar: [Author Only](#) [Title Only](#) [Author and Title](#)

Luo M, Dennis ES, Berger F, Peacock WJ, Chaudhury A (2005) MINISEED3 (MINI3), a WRKY family gene, and HAIKU2 (IKU2), a leucine-rich repeat (LRR) KINASE gene, are regulators of seed size in *Arabidopsis*. *Proceedings of the National Academy of Sciences of the United States of America* 102: 17531-17536

Pubmed: [Author and Title](#)

CrossRef: [Author and Title](#)

Google Scholar: [Author Only](#) [Title Only](#) [Author and Title](#)

Ma H-W, Buer J, Zeng A-P (2004) Hierarchical structure and modules in the *Escherichia coli* transcriptional regulatory network revealed by a new top-down approach. *BMC Bioinformatics* 5: 199

Pubmed: [Author and Title](#)

CrossRef: [Author and Title](#)

Google Scholar: [Author Only](#) [Title Only](#) [Author and Title](#)

Magallón S, Sanderson MJ (2002) Relationships among seed plants inferred from highly conserved genes: sorting conflicting phylogenetic signals among ancient lineages. *American Journal of Botany* 89: 1991-2006

Pubmed: [Author and Title](#)

CrossRef: [Author and Title](#)

Google Scholar: [Author Only](#) [Title Only](#) [Author and Title](#)

Margolin AA, Nemenman I, Basso K, Wiggins C, Stolovitzky G, Favera RD, Califano A (2006) ARACNE: An Algorithm for the Reconstruction of Gene Regulatory Networks in a Mammalian Cellular Context. *BMC Bioinformatics* 7: S7-S7

Pubmed: [Author and Title](#)

CrossRef: [Author and Title](#)

Google Scholar: [Author Only](#) [Title Only](#) [Author and Title](#)

McAbee JM, Hill TA, Skinner DJ, Izhaki A, Hauser BA, Meister RJ, Venugopala Reddy G, Meyerowitz EM, Bowman JL, Gasser CS (2006) ABERRANT TESTASHAPE encodes a KANADI family member, linking polarity determination to separation and growth of *Arabidopsis* ovule integuments. 46: 522-531

Pubmed: [Author and Title](#)

CrossRef: [Author and Title](#)

Google Scholar: [Author Only](#) [Title Only](#) [Author and Title](#)

Medina-Rivera A, Defrance M, Sand O, Herrmann C, Castro-Mondragon JA, Delerce J, Jaeger S, Blanchet C, Vincens P, Caron C, Staines DM, Contreras-Moreira B, Artufel M, Charbonnier-Khamvongsa L, Hernandez C, Thieffry D, Thomas-Chollier M, van Helden J (2015) RSAT 2015: Regulatory Sequence Analysis Tools. *Nucleic Acids Research*

Pubmed: [Author and Title](#)

CrossRef: [Author and Title](#)

Google Scholar: [Author Only](#) [Title Only](#) [Author and Title](#)

Nesi N, Jond C, Debeaujon I, Caboche M, Lepiniec L (2001) The Arabidopsis TT2 Gene Encodes an R2R3 MYB Domain Protein That Acts as a Key Determinant for Proanthocyanidin Accumulation in Developing Seed. *The Plant Cell* 13: 2099-2114

Pubmed: [Author and Title](#)

CrossRef: [Author and Title](#)

Google Scholar: [Author Only](#) [Title Only](#) [Author and Title](#)



**Newman MEJ, Girvan M (2004) Finding and evaluating community structure in networks. Physical Review E 69: 026113**

Pubmed: [Author and Title](#)

CrossRef: [Author and Title](#)

Google Scholar: [Author Only Title Only Author and Title](#)

bioRxiv preprint doi: <https://doi.org/10.1101/165894>; this version posted July 20, 2017. The copyright holder for this preprint (which was not certified by peer review) is the author/funder, who has granted bioRxiv a license to display the preprint in perpetuity. It is made available under aCC-BY-NC-ND 4.0 International license.

**Nygaard V, Rødland EA, Hovig E (2015) Methods that remove batch effects while retaining group differences may lead to exaggerated confidence in downstream analyses. Biostatistics**

Pubmed: [Author and Title](#)

CrossRef: [Author and Title](#)

Google Scholar: [Author Only Title Only Author and Title](#)

**Obayashi T, Kinoshita K (2011) COXPRESdb: a database to compare gene coexpression in seven model animals. Nucleic Acids Research 39: D1016-D1022**

Pubmed: [Author and Title](#)

CrossRef: [Author and Title](#)

Google Scholar: [Author Only Title Only Author and Title](#)

**Ogas J, Kaufmann S, Henderson J, Somerville C (1999) PICKLE is a CHD3 chromatin-remodeling factor that regulates the transition from embryonic to vegetative development in Arabidopsis. Proceedings of the National Academy of Sciences 96: 13839-13844**

Pubmed: [Author and Title](#)

CrossRef: [Author and Title](#)

Google Scholar: [Author Only Title Only Author and Title](#)

**Palaniswamy SK, James S, Sun H, Lamb RS, Davuluri RV, Grotewold E (2006) AGRIS and AtRegNet. A Platform to Link cis-Regulatory Elements and Transcription Factors into Regulatory Networks. Plant Physiology 140: 818-829**

Pubmed: [Author and Title](#)

CrossRef: [Author and Title](#)

Google Scholar: [Author Only Title Only Author and Title](#)

**Portereiko MF, Lloyd A, Steffen JG, Punwani JA, Otsuga D, Drews GN (2006) AGL80 Is Required for Central Cell and Endosperm Development in Arabidopsis. The Plant Cell 18: 1862-1872**

Pubmed: [Author and Title](#)

CrossRef: [Author and Title](#)

Google Scholar: [Author Only Title Only Author and Title](#)

**Qiu D, Xiao J, Ding X, Xiong M, Cai M, Cao Y, Li X, Xu C, Wang S (2007) OsWRKY13 Mediates Rice Disease Resistance by Regulating Defense-Related Genes in Salicylate- and Jasmonate-Dependent Signaling. Molecular Plant-Microbe Interactions 20: 492-499**

Pubmed: [Author and Title](#)

CrossRef: [Author and Title](#)

Google Scholar: [Author Only Title Only Author and Title](#)

**Ruuska SA, Girke T, Benning C, Ohlrogge JB (2002) Contrapuntal Networks of Gene Expression during Arabidopsis Seed Filling. The Plant Cell 14: 1191-1206**

Pubmed: [Author and Title](#)

CrossRef: [Author and Title](#)

Google Scholar: [Author Only Title Only Author and Title](#)

**Ruuska SA, Schwender J, Ohlrogge JB (2004) The Capacity of Green Oilseeds to Utilize Photosynthesis to Drive Biosynthetic Processes. Plant Physiology 136: 2700-2709**

Pubmed: [Author and Title](#)

CrossRef: [Author and Title](#)

Google Scholar: [Author Only Title Only Author and Title](#)

**Sato Y, Namiki N, Takehisa H, Kamatsuki K, Minami H, Ikawa H, Ohyanagi H, Sugimoto K, Itoh J-I, Antonio BA, Nagamura Y (2012) RiceFRIEND: a platform for retrieving coexpressed gene networks in rice. Nucleic Acids Research**

Pubmed: [Author and Title](#)

CrossRef: [Author and Title](#)

Google Scholar: [Author Only Title Only Author and Title](#)

**Schwender J, Goffman F, Ohlrogge JB, Shachar-Hill Y (2004) Rubisco without the Calvin cycle improves the carbon efficiency of developing green seeds. Nature 432: 779-782**

Pubmed: [Author and Title](#)

CrossRef: [Author and Title](#)

Google Scholar: [Author Only Title Only Author and Title](#)

**Shannon P, Markiel A, Ozier O, Baliga NS, Wang JT, Ramage D, Amin N, Schwikowski B, Ideker T (2003) Cytoscape: A Software Environment for Integrated Models of Biomolecular Interaction Networks. Genome Res 13**

Pubmed: [Author and Title](#)

CrossRef: [Author and Title](#)

Google Scholar: [Author Only Title Only Author and Title](#)

**Spitz F, Furlong EE (2012) Transcription factors: from enhancer binding to developmental control. Nat Rev Genet 13: 613-626**

Pubmed: [Author and Title](#)

CrossRef: [Author and Title](#)

Google Scholar: [Author Only Title Only Author and Title](#)

**Sreenivasulu N, Wobus U (2013) Seed-development programs: a systems biology-based comparison between dicots and monocots. Annu Rev Plant Biol 64: 189-217**

Pubmed: [Author and Title](#)

CrossRef: [Author and Title](#)

Google Scholar: [Author Only Title Only Author and Title](#)

bioRxiv preprint doi: <https://doi.org/10.1101/165894>; this version posted July 20, 2017. The copyright holder for this preprint (which was not certified by peer review) is the author/funder, who has granted bioRxiv a license to display the preprint in perpetuity. It is made available under aCC-BY-NC-ND 4.0 International license.

**Suzuki M, McCabe DR (2008) Functional symmetry has the E3 network controlling seed development. Current Opinion in Plant Biology 11: 548-553**

Pubmed: [Author and Title](#)

CrossRef: [Author and Title](#)

Google Scholar: [Author Only Title Only Author and Title](#)

**To A, Valon C, Savino G, Guilleminot J, Devic M, Giraudat J, Parcy F (2006) A Network of Local and Redundant Gene Regulation Governs Arabidopsis Seed Maturation. The Plant Cell 18: 1642-1651**

Pubmed: [Author and Title](#)

CrossRef: [Author and Title](#)

Google Scholar: [Author Only Title Only Author and Title](#)

**Vermeirssen V, De Clercq I, Van Parys T, Van Breusegem F, Van de Peer Y (2014) Arabidopsis Ensemble Reverse-Engineered Gene Regulatory Network Discloses Interconnected Transcription Factors in Oxidative Stress. The Plant Cell 26: 4656-4679**

Pubmed: [Author and Title](#)

CrossRef: [Author and Title](#)

Google Scholar: [Author Only Title Only Author and Title](#)

**Vriet C, Welham T, Brachmann A, Pike M, Pike J, Perry J, Parniske M, Sato S, Tabata S, Smith AM, Wang TL (2010) A Suite of Lotus japonicus Starch Mutants Reveals Both Conserved and Novel Features of Starch Metabolism. Plant Physiology 154: 643-655**

Pubmed: [Author and Title](#)

CrossRef: [Author and Title](#)

Google Scholar: [Author Only Title Only Author and Title](#)

**Wendrich JR, Weijers D (2013) The Arabidopsis embryo as a miniature morphogenesis model. New Phytologist 199: 14-25**

Pubmed: [Author and Title](#)

CrossRef: [Author and Title](#)

Google Scholar: [Author Only Title Only Author and Title](#)

**Xiao J, Cheng H, Li X, Xiao J, Xu C, Wang S (2013) Rice WRKY13 Regulates Cross Talk between Abiotic and Biotic Stress Signaling Pathways by Selective Binding to Different cis-Elements. Plant Physiology 163: 1868-1882**

Pubmed: [Author and Title](#)

CrossRef: [Author and Title](#)

Google Scholar: [Author Only Title Only Author and Title](#)

**Yamamoto A, Kagaya Y, Toyoshima R, Kagaya M, Takeda S, Hattori T (2009) Arabidopsis NF-YB subunits LEC1 and LEC1-LIKE activate transcription by interacting with seed-specific ABRE-binding factors. 58: 843-856**

Pubmed: [Author and Title](#)

CrossRef: [Author and Title](#)

Google Scholar: [Author Only Title Only Author and Title](#)

**Yeung KY, Haynor DR, Ruzzo WL (2001) Validating clustering for gene expression data. Bioinformatics 17: 309-318**

Pubmed: [Author and Title](#)

CrossRef: [Author and Title](#)

Google Scholar: [Author Only Title Only Author and Title](#)

**Yi X, Du Z, Su Z (2013) PlantGSEA: a gene set enrichment analysis toolkit for plant community. Nucleic Acids Res 41: W98-103**

Pubmed: [Author and Title](#)

CrossRef: [Author and Title](#)

Google Scholar: [Author Only Title Only Author and Title](#)

**Yilmaz A, Mejia-Guerra MK, Kurz K, Liang X, Welch L, Grotewold E (2011) AGRIS: the Arabidopsis Gene Regulatory Information Server, an update. Nucleic Acids Res 39: D1118-1122**

Pubmed: [Author and Title](#)

CrossRef: [Author and Title](#)

Google Scholar: [Author Only Title Only Author and Title](#)

**Yim WC, Yu Y, Song K, Jang CS, Lee B-M (2013) PLANEX: the plant co-expression database. BMC Plant Biology 13: 83**

Pubmed: [Author and Title](#)

CrossRef: [Author and Title](#)

Google Scholar: [Author Only Title Only Author and Title](#)

**Yu X, Li L, Zola J, Aluru M, Ye H, Foudree A, Guo H, Anderson S, Aluru S, Liu P, Rodermeier S, Yin Y (2011) A brassinosteroid transcriptional network revealed by genome-wide identification of BES1 target genes in Arabidopsis thaliana. Plant J 65: 634-646**

Pubmed: [Author and Title](#)

CrossRef: [Author and Title](#)

Google Scholar: [Author Only Title Only Author and Title](#)

**Zimmermann P, Hirsch-Hoffmann M, Hennig L, Gruissem W (2004) GENEVESTIGATOR. Arabidopsis Microarray Database and Analysis Toolbox. Plant Physiology 136: 2621-2632**

Pubmed: [Author and Title](#)

CrossRef: [Author and Title](#)

Google Scholar: [Author Only Title Only Author and Title](#)
